# Supplementary material for: Identification of quiescent FOXC2+ spermatogonial stem cells in adult mammals
Source: eLife. 2023 Aug 23;12:RP85380. doi: 10.7554/eLife.85380 (PMC10446825; doi:10.7554/eLife.85380)
Supplement: Figure 1—source data 1. [file elife-85380-fig1-data1.xlsx]

## Sheet: table S1
p_val	avg_logFC	pct.1	pct.2	cluster	gene
2.1653e-29	0.338574	0.661	0.493	1	Rasgrp2
8.53496e-27	0.287389	0.397	0.216	1	Tcl1
1.00258e-26	0.308961	0.415	0.238	1	Ppfibp2
2.46455e-21	0.31823	0.819	0.735	1	Chd4
3.11164e-19	0.198794	0.257	0.126	1	Foxc2
4.25272e-19	0.255591	0.475	0.339	1	Mcam
9.35277e-19	0.209142	0.829	0.703	1	Ccnd2
6.47535e-16	0.202474	0.296	0.171	1	Gfra1
2.26958e-14	0.22447	0.698	0.639	1	Rest
1.03266e-12	0.139629	0.171	0.081	1	Egr2
2.3695e-12	0.179057	0.304	0.196	1	Esrp1
4.79736e-12	0.153011	0.317	0.204	1	Dusp6
5.45896e-12	0.122591	0.111	0.041	1	Cyp2u1
2.48577e-11	0.181305	0.407	0.301	1	Ssbp2
7.67716e-11	0.16894	0.294	0.195	1	Helz
1.61937e-10	0.154949	0.245	0.154	1	Etv5
2.07944e-10	0.171241	0.288	0.189	1	Gm36028
2.31074e-09	0.133679	0.237	0.149	1	Sphk1
2.42427e-09	0.148981	0.207	0.125	1	Lhx1
8.22948e-09	0.180723	0.35	0.264	1	Fst
8.82147e-09	0.148298	0.312	0.223	1	Pdzd2
2.44712e-08	0.118266	0.167	0.095	1	Polr3gl
3.24281e-08	0.13228	0.248	0.169	1	Nav2
4.40806e-08	0.11345	0.327	0.227	1	Nefm
5.22181e-08	0.143053	0.206	0.133	1	Rasl11a
5.77712e-08	0.134807	0.224	0.148	1	Lonp2
9.12755e-08	0.121072	0.23	0.151	1	Gm36899
1.70315e-07	0.0931841	0.13	0.071	1	Smad6
2.04866e-07	0.0801106	0.115	0.058	1	Caly
3.6233e-07	0.123117	0.252	0.178	1	Ret
3.86042e-141	0.838386	0.705	0.182	2	Top2a
1.89662e-129	0.845325	0.982	0.8	2	Hmgb2
1.25562e-98	0.368929	0.356	0.039	2	Mki67
1.50082e-96	0.717772	0.646	0.217	2	Ccnb1
1.15732e-91	0.639336	0.605	0.186	2	Ube2c
1.13834e-88	0.761898	0.931	0.699	2	Tuba3a
4.20912e-85	0.458955	0.491	0.116	2	Ccna2
1.63563e-83	0.765774	0.843	0.496	2	Cenpf
4.72539e-79	0.427272	0.444	0.097	2	Pclaf
4.90817e-71	0.382953	0.387	0.081	2	Nusap1
1.16164e-70	0.401483	0.44	0.11	2	Cdk1
1.87963e-64	0.711201	0.809	0.558	2	Cks2
4.61961e-62	0.618083	0.772	0.452	2	Cenpa
4.41591e-61	0.424805	0.485	0.157	2	Cdca3
5.14e-57	0.659728	0.853	0.63	2	Arl6ip1
2.38691e-55	0.383259	0.385	0.105	2	Prc1
6.0175e-55	0.376164	0.495	0.168	2	Birc5
1.45397e-54	0.234252	0.275	0.049	2	Kif11
2.78746e-54	0.351738	0.409	0.118	2	Prim1
5.89297e-53	0.398363	0.507	0.187	2	Ccnb2
4.45144e-50	0.527641	0.927	0.813	2	Tubb5
4.91147e-50	0.449051	0.568	0.248	2	Cenpe
1.19374e-47	0.311853	0.397	0.124	2	Pbk
2.82648e-47	0.483515	0.699	0.4	2	Smc4
1.01643e-46	0.373412	0.499	0.198	2	Spc25
1.40611e-45	0.445358	0.827	0.582	2	Dek
1.77762e-45	0.449101	0.497	0.211	2	Cdc20
1.55439e-44	0.283973	0.328	0.09	2	Tpx2
1.74265e-44	0.426487	0.843	0.584	2	Nasp
2.07731e-44	0.292757	0.336	0.094	2	Kif23
6.04635e-78	0.373745	0.379	0.074	3	Ddit4
3.64232e-69	0.370761	0.37	0.081	3	Igfbp6
1.4252e-68	0.378066	0.364	0.081	3	Upp1
6.69684e-66	0.580797	0.644	0.319	3	Egr4
3.99406e-61	0.484677	0.521	0.199	3	Hmgn5
3.02421e-48	0.192378	0.167	0.016	3	Neurog3
3.06487e-48	0.366341	0.43	0.158	3	Nanos3
1.11321e-46	0.452047	0.897	0.748	3	Sdc4
2.0755e-41	0.389883	0.925	0.821	3	Uchl1
1.12997e-40	0.275235	0.341	0.113	3	Idnk
7.43646e-38	0.396329	0.575	0.33	3	Psmb10
2.9804e-37	0.356934	0.597	0.328	3	Sohlh1
1.57496e-35	0.373325	0.782	0.551	3	Psme1
8.14921e-35	0.248877	0.297	0.099	3	Sox3
8.13323e-34	0.39766	0.905	0.819	3	Map1lc3b
1.04976e-32	0.340928	0.505	0.261	3	Gng13
5.15118e-31	0.265216	0.33	0.129	3	Lin28a
1.07322e-30	0.171035	0.215	0.057	3	Ndrg4
3.97359e-30	0.364349	0.797	0.62	3	D10Wsu102e
4.06812e-30	0.317334	0.713	0.488	3	Rbbp6
1.07801e-29	0.20735	0.252	0.082	3	Stx6
2.42641e-28	0.148396	0.134	0.023	3	Onecut2
7.27908e-27	0.150629	0.151	0.032	3	Phlda2
1.22056e-26	0.158172	0.166	0.04	3	Oasl2
1.3367e-25	0.191775	0.267	0.1	3	Fbxo32
1.72332e-25	0.310239	0.593	0.383	3	Pmm1
2.00273e-25	0.268629	0.466	0.256	3	Stau1
3.64891e-25	0.261451	0.423	0.225	3	Agpat5
1.54519e-24	0.18087	0.211	0.069	3	Lgals2
6.12697e-24	0.0814246	0.077	0.006	3	Sntg2
9.85348e-129	1.59815	0.811	0.146	4	Stra8
6.87038e-30	0.568983	0.328	0.076	4	Gm13075
5.00458e-29	0.454016	0.194	0.027	4	Ptcra
1.27032e-27	0.316065	0.233	0.043	4	Rbp1
9.5034e-19	0.205519	0.156	0.028	4	Pcsk1n
2.90951e-18	0.261603	0.25	0.069	4	Dlk1
2.77404e-17	0.19024	0.183	0.041	4	Cited1
9.64542e-17	0.114529	0.117	0.017	4	Kit
1.57763e-15	0.214958	0.222	0.063	4	Lonrf3
4.08847e-13	0.329485	0.844	0.756	4	Polr2e
6.98642e-12	0.155889	0.183	0.055	4	Gadd45b
1.16591e-11	0.313084	0.878	0.798	4	Psma4
1.60217e-11	0.33357	0.617	0.389	4	Chd3os
3.75983e-11	0.324397	0.706	0.538	4	Prdx5
7.17529e-11	0.284646	0.183	0.059	4	Unc13d
8.794e-11	0.300479	0.672	0.493	4	Timm13
1.11984e-10	0.102805	0.072	0.011	4	Cyp4x1
2.07073e-10	0.15209	0.228	0.084	4	Gins2
1.084e-09	0.30996	0.733	0.593	4	Tbcb
4.04112e-09	0.0896734	0.122	0.033	4	H2-Q2
6.73923e-09	0.0621393	0.067	0.011	4	Dnm1
1.14695e-08	0.357543	0.156	0.053	4	Olfr889
2.0276e-08	0.125319	0.15	0.05	4	Sox12
2.79047e-08	0.128717	0.194	0.075	4	Hormad1
2.8897e-08	0.0960409	0.061	0.011	4	Siglec1
2.95885e-08	0.138877	0.211	0.085	4	Msantd3
3.19712e-08	0.10462	0.167	0.059	4	Cilp2
3.22475e-08	0.0608543	0.083	0.019	4	Cntfr
3.40207e-08	0.0640473	0.078	0.017	4	Hist1h2bm
3.695e-08	0.240514	0.806	0.683	4	Atp5g3
4.68803e-139	1.76861	0.892	0.073	5	Cd52
8.47987e-137	0.504638	0.351	0.004	5	Tcrg-C1
1.92914e-124	0.749838	0.581	0.026	5	Ucp2
1.7711e-120	0.778003	0.527	0.021	5	Ptprcap
8.33822e-107	1.19062	0.459	0.018	5	Trdc
1.15255e-102	1.1956	0.838	0.091	5	S100a10
9.04068e-98	0.898156	0.541	0.031	5	Cd3g
2.51318e-95	0.673222	0.459	0.021	5	Arhgdib
9.47484e-95	1.1185	0.784	0.083	5	H2-D1
5.24565e-94	0.839641	0.595	0.042	5	Vim
2.63604e-89	0.548456	0.405	0.017	5	Hcst
7.76621e-82	0.704959	0.527	0.037	5	Emp3
7.9705e-82	0.447838	0.311	0.009	5	Cd163l1
5.69169e-80	0.387756	0.27	0.007	5	Serpinb1a
1.0974e-79	0.498518	0.351	0.014	5	Ramp1
6.27466e-77	0.475828	0.351	0.015	5	Laptm5
2.69922e-76	1.85589	0.716	0.091	5	S100a4
5.59059e-75	0.464904	0.311	0.011	5	Cxcr6
3.6899e-71	0.298599	0.203	0.003	5	Samsn1
3.86138e-69	0.339856	0.27	0.009	5	Trbc1
5.59164e-69	0.604695	0.459	0.033	5	Thy1
9.50733e-68	0.36425	0.257	0.008	5	Cd53
3.17273e-67	0.627183	0.473	0.036	5	Ptpn18
1.01911e-63	0.408703	0.149	0.001	5	Cd79b
3.49381e-63	0.2275	0.216	0.005	5	Tespa1
1.72723e-62	0.311101	0.23	0.007	5	Slfn2
4.20898e-62	0.656583	0.554	0.058	5	H2-K1
9.72996e-62	0.187765	0.135	0.001	5	Ltb4r1
1.1502e-61	0.884725	0.176	0.003	5	Vpreb3
6.0841e-59	0.254322	0.189	0.004	5	Bcl2a1b
