# Supplementary material for: Identification of quiescent FOXC2+ spermatogonial stem cells in adult mammals
Source: eLife. 2023 Aug 23;12:RP85380. doi: 10.7554/eLife.85380 (PMC10446825; doi:10.7554/eLife.85380)
Supplement: Figure 6—source data 1. [file elife-85380-fig6-data1.xlsx]

## Sheet: list
sheet	legend
A	DEGs
B	GO_scRNA-seq

## Sheet: A
group	DEG
scRNA-seq	Rest
scRNA-seq	Pdzd2
scRNA-seq	Ptpn13
scRNA-seq	Foxc2
scRNA-seq	Gfra1
scRNA-seq	Jak1
scRNA-seq	Rpl21
scRNA-seq	Usp34
scRNA-seq	Gm36028
scRNA-seq	Ret
scRNA-seq	Gm42418
scRNA-seq	Rpl22l1
scRNA-seq	Scmh1
scRNA-seq	Malat1
scRNA-seq	G2e3
scRNA-seq	Rpl39l
scRNA-seq	Fst
scRNA-seq	Tcl1
scRNA-seq	Prpsap1
scRNA-seq	Tspan8
scRNA-seq	Nefm
scRNA-seq	Rasl11a
scRNA-seq	Prm3
scRNA-seq	Nrxn2
scRNA-seq	Tnrc6c
scRNA-seq	Itm2c
scRNA-seq	Rpl31
scRNA-seq	Irx1
scRNA-seq	Syn2
scRNA-seq	Aaed1
scRNA-seq	Mprip
scRNA-seq	Bod1l
scRNA-seq	Rps29
scRNA-seq	Dync1i2
scRNA-seq	Fgd5
scRNA-seq	Gm36899
scRNA-seq	Hectd1
scRNA-seq	Ccdc174
scRNA-seq	Abca1
scRNA-seq	Bri3
scRNA-seq	Tox3
scRNA-seq	Barhl2
scRNA-seq	Atxn1
scRNA-seq	Sun3
scRNA-seq	Rpsa
scRNA-seq	Rab4a
scRNA-seq	Shisa2
scRNA-seq	Lhx2
scRNA-seq	Cox6b1
scRNA-seq	Chd4
scRNA-seq	Arpc3
scRNA-seq	Batf
scRNA-seq	Cox7a2l
scRNA-seq	Map4k4
scRNA-seq	Cab39
scRNA-seq	Tbc1d4
scRNA-seq	Zfp36l1
scRNA-seq	Odf1
scRNA-seq	Med13l
scRNA-seq	Pqlc1
scRNA-seq	Dstn
scRNA-seq	Rpl32
scRNA-seq	Tagln2
scRNA-seq	Wwp1
scRNA-seq	Afdn
scRNA-seq	Snrpf
scRNA-seq	Arhgap26
scRNA-seq	Mcam
scRNA-seq	Cbx7
scRNA-seq	Zbtb20
scRNA-seq	Gna13
scRNA-seq	Ppfibp2
scRNA-seq	Nub1
scRNA-seq	Mfsd4a
scRNA-seq	Rbpms
scRNA-seq	Cbln2
scRNA-seq	Tsc22d3
scRNA-seq	Ssbp2
scRNA-seq	Phip
scRNA-seq	Eif4g3
scRNA-seq	Igfbp5
scRNA-seq	Eomes
scRNA-seq	Mpped2
scRNA-seq	Fnbp1l
scRNA-seq	Foxp1
scRNA-seq	Atad2
scRNA-seq	Ctsl
scRNA-seq	Zzz3
scRNA-seq	Aplp2
scRNA-seq	Tulp2
scRNA-seq	Atp5g2
scRNA-seq	Fyn
scRNA-seq	Vamp3
scRNA-seq	Pfdn1
scRNA-seq	Glo1
scRNA-seq	Mterf4
scRNA-seq	Tpm1
scRNA-seq	Usf1
scRNA-seq	Nfyb
scRNA-seq	Ptbp3
scRNA-seq	Selenok
scRNA-seq	Plvap
scRNA-seq	Chn2
scRNA-seq	Ilvbl
scRNA-seq	Gm29243
scRNA-seq	Zfp36l2
scRNA-seq	Nid1
scRNA-seq	Tanc1
scRNA-seq	Naa35
scRNA-seq	Rasgrp2
scRNA-seq	Fuca1
scRNA-seq	Krtap17-1
scRNA-seq	Cyp2a12
scRNA-seq	Fam32a
scRNA-seq	Zcrb1
scRNA-seq	Dmrt2
scRNA-seq	Timm17a
scRNA-seq	Vamp4
scRNA-seq	Sptbn1
scRNA-seq	Wapl
scRNA-seq	Cdv3
scRNA-seq	Midn
scRNA-seq	Pbrm1
scRNA-seq	Frg1
scRNA-seq	Akirin1
scRNA-seq	Ssbp3
scRNA-seq	Magi3
scRNA-seq	Hlf
scRNA-seq	Zfp449
scRNA-seq	Rps15a
scRNA-seq	Sox4
scRNA-seq	Pdx1
scRNA-seq	R3hdm2
scRNA-seq	Pik3ca
scRNA-seq	Grasp
scRNA-seq	Rps7
scRNA-seq	Sphk1
scRNA-seq	Noct
scRNA-seq	Yeats4
scRNA-seq	Rbm39
scRNA-seq	Rnf44
scRNA-seq	Rlim
scRNA-seq	Dnajc24
scRNA-seq	1700017B05Rik
scRNA-seq	Txnip
scRNA-seq	Fastkd2
scRNA-seq	Pcm1
scRNA-seq	D430019H16Rik
scRNA-seq	Gdi2
scRNA-seq	Inpp5f
scRNA-seq	Cnn2
scRNA-seq	Golgb1
scRNA-seq	Dusp5
scRNA-seq	Hipk1
scRNA-seq	Frmd6
scRNA-seq	Pbx1
scRNA-seq	Ddx46
scRNA-seq	Fam222b
scRNA-seq	Sem1
scRNA-seq	Auts2
scRNA-seq	Myo18a
scRNA-seq	Tra2a
scRNA-seq	Ensa
scRNA-seq	Rpl15
scRNA-seq	B430010I23Rik
scRNA-seq	Slc3a2
scRNA-seq	Barx1
scRNA-seq	Cenpa
scRNA-seq	Ppp1cb
scRNA-seq	Helz
scRNA-seq	Rasa1
scRNA-seq	Elavl2
scRNA-seq	Adgrl2
scRNA-seq	Wipi1
scRNA-seq	Phf3
scRNA-seq	Col18a1
scRNA-seq	Acp1
scRNA-seq	Rpl35a
scRNA-seq	Rnf122
scRNA-seq	Id4
scRNA-seq	Egr1
scRNA-seq	Rps27
scRNA-seq	Sec63
scRNA-seq	Dnajc19
scRNA-seq	Hjurp
scRNA-seq	Gm8126
scRNA-seq	Ubald2
scRNA-seq	Tfam
scRNA-seq	Pnisr
scRNA-seq	Caly
scRNA-seq	Cdk2ap2
scRNA-seq	Rpl4
scRNA-seq	Ypel5
scRNA-seq	Rras
scRNA-seq	Hes1
scRNA-seq	2700062C07Rik
scRNA-seq	Taf7
scRNA-seq	Mpdz
scRNA-seq	Styx
scRNA-seq	Jun
scRNA-seq	Sbno1
scRNA-seq	Tmc6
scRNA-seq	Ndufa10
scRNA-seq	Itga6
scRNA-seq	Fzd10
scRNA-seq	Pdk1
scRNA-seq	Tjp1
scRNA-seq	Ccdc34
scRNA-seq	Zdhhc14
scRNA-seq	Fam217a
scRNA-seq	Glis3
scRNA-seq	Upf2
scRNA-seq	Usp7
scRNA-seq	Med31
scRNA-seq	Asap1
scRNA-seq	Med21
scRNA-seq	Trp53bp1
scRNA-seq	2900026A02Rik
scRNA-seq	Rab5c
scRNA-seq	Dst
scRNA-seq	Zwilch
scRNA-seq	Etv5
scRNA-seq	Tmem132c
scRNA-seq	Cd151
scRNA-seq	Nusap1
scRNA-seq	Lpin2
scRNA-seq	Fos
scRNA-seq	Cst3
scRNA-seq	Slc9a3r1
scRNA-seq	1700041G16Rik
scRNA-seq	Rrbp1
scRNA-seq	Epn1
scRNA-seq	Lsm5
scRNA-seq	Ipo5
scRNA-seq	St6galnac2
scRNA-seq	Terf1
scRNA-seq	Ift80
scRNA-seq	Vps13d
scRNA-seq	Cnnm1
scRNA-seq	Zc3h15
scRNA-seq	Sfr1
scRNA-seq	Mad2l1
scRNA-seq	Paip2
scRNA-seq	Nrd1
scRNA-seq	Slc38a1
scRNA-seq	Pdzd8
scRNA-seq	Wwtr1
scRNA-seq	Spata46
scRNA-seq	Irf2
scRNA-seq	Cyb5a
scRNA-seq	Dnajc10
scRNA-seq	Zfp512
scRNA-seq	Virma
scRNA-seq	Smcp
scRNA-seq	Bclaf3
scRNA-seq	Pdcd10
scRNA-seq	E130102H24Rik
scRNA-seq	Scp2
scRNA-seq	Coa3
scRNA-seq	Dgkk
scRNA-seq	Asf1a
scRNA-seq	Tdrd7
scRNA-seq	Med8
scRNA-seq	BC055324
scRNA-seq	Cep295
scRNA-seq	Scarb2
scRNA-seq	Sp3os
scRNA-seq	Arrb2
scRNA-seq	Hadhb
scRNA-seq	Spert
scRNA-seq	Efhb
scRNA-seq	Csde1
scRNA-seq	Sec62
scRNA-seq	Chn1
scRNA-seq	Ndufaf2
scRNA-seq	Ubn2
scRNA-seq	Setd5
scRNA-seq	Rpl39
scRNA-seq	Rpap3
scRNA-seq	Gin1
scRNA-seq	Rpl37a
scRNA-seq	Rab2a
scRNA-seq	Slc39a11
scRNA-seq	Dppa4
scRNA-seq	Slk
scRNA-seq	Gng5
scRNA-seq	Spata5
scRNA-seq	Cln5
scRNA-seq	Pomp
scRNA-seq	Disp1
scRNA-seq	Mtmr7
scRNA-seq	Pacsin2
scRNA-seq	Cd164
scRNA-seq	Arhgap31
scRNA-seq	Akirin2
scRNA-seq	Rpl13a
scRNA-seq	Sh3bgrl
scRNA-seq	Iqcf4
scRNA-seq	Ocln
scRNA-seq	Kcnc2
scRNA-seq	Gcsh
scRNA-seq	Mplkip
scRNA-seq	Tpt1
scRNA-seq	Polr3gl
scRNA-seq	Trmt112
scRNA-seq	2400006E01Rik
scRNA-seq	Dmrt3
scRNA-seq	Pcbp2
scRNA-seq	Ift57
scRNA-seq	4921507P07Rik
scRNA-seq	Cd109
scRNA-seq	Gtsf1
scRNA-seq	2810474O19Rik
scRNA-seq	Grcc10
scRNA-seq	Mapk10
scRNA-seq	Stat1
scRNA-seq	Knstrn
scRNA-seq	Cd81
scRNA-seq	Caprin2
scRNA-seq	Acadl
scRNA-seq	Tsc22d2
scRNA-seq	Taf4b
scRNA-seq	Arhgef25
scRNA-seq	Upf3b
scRNA-seq	Mtr
scRNA-seq	Plod2
scRNA-seq	Ndufb4
scRNA-seq	Akap4
scRNA-seq	Tnks
scRNA-seq	Smad6
scRNA-seq	Ctsd
scRNA-seq	Strbp
scRNA-seq	Leprotl1
scRNA-seq	Cd93
scRNA-seq	Slc30a9
scRNA-seq	Tpm3
scRNA-seq	Idh3b
scRNA-seq	Calcoco1
scRNA-seq	Btbd7
scRNA-seq	Crygs
scRNA-seq	Foxf1
scRNA-seq	Krit1
scRNA-seq	2310009B15Rik
scRNA-seq	Cox7b2
scRNA-seq	Angel2
scRNA-seq	Bbip1
scRNA-seq	Gpsm3
scRNA-seq	Tars2
scRNA-seq	Ncapg2
scRNA-seq	4833420G17Rik
scRNA-seq	Stx7
scRNA-seq	Abr
scRNA-seq	Fkbp1a
scRNA-seq	Ccdc141
scRNA-seq	Ccsap
scRNA-seq	Pold3
scRNA-seq	Ubap1
scRNA-seq	Itfg2
scRNA-seq	Cbr1
scRNA-seq	Rpl12
scRNA-seq	Lrrc47
scRNA-seq	Dusp7
scRNA-seq	Ccdc112
scRNA-seq	Anxa7
scRNA-seq	1700003P14Rik
scRNA-seq	Cdyl
scRNA-seq	Fubp1
scRNA-seq	Tcf7l1
scRNA-seq	Gm11808
scRNA-seq	Prrx2
scRNA-seq	Zfand1
scRNA-seq	Rpl29
scRNA-seq	Hmgxb4
scRNA-seq	Casc4
scRNA-seq	Mrps14
scRNA-seq	Ccl25
scRNA-seq	Pygl
scRNA-seq	Max
scRNA-seq	Egr2
scRNA-seq	Armc10
scRNA-seq	Utp3
scRNA-seq	Txndc2
scRNA-seq	Wwc2
scRNA-seq	Anapc16
scRNA-seq	Kmt2c
scRNA-seq	Chd7
scRNA-seq	Pnrc1
scRNA-seq	Commd8
scRNA-seq	Ndfip2
scRNA-seq	Gm10399
scRNA-seq	Xrn2
scRNA-seq	1810037I17Rik
scRNA-seq	1500009L16Rik
scRNA-seq	Npepl1
scRNA-seq	Abcd3
scRNA-seq	Cir1
scRNA-seq	Smdt1
scRNA-seq	Sclt1
scRNA-seq	Atp2b1
scRNA-seq	Tescl
scRNA-seq	4930407I10Rik
scRNA-seq	Prdx4
scRNA-seq	Mbd2
scRNA-seq	Frg2f1
scRNA-seq	Raf1
scRNA-seq	Phf20l1
scRNA-seq	Chsy1
scRNA-seq	Igf1r
scRNA-seq	Nlrp4f
scRNA-seq	Ppp1ca
scRNA-seq	Tspan31
scRNA-seq	Hbegf
scRNA-seq	Cetn3
scRNA-seq	Rpa3
scRNA-seq	Sdcbp
scRNA-seq	Zfp950
scRNA-seq	Rpl34
scRNA-seq	Trip12
scRNA-seq	Etfdh
scRNA-seq	Eif5a2
scRNA-seq	Fdxacb1
scRNA-seq	Ip6k1
scRNA-seq	Msh2
scRNA-seq	Ankrd12
scRNA-seq	Ube2d3
scRNA-seq	Gnas
scRNA-seq	Mpc1
scRNA-seq	Hoxc8
scRNA-seq	Cwf19l2
scRNA-seq	Cd9
scRNA-seq	Tacc2
scRNA-seq	Arhgap29
scRNA-seq	Lyst
scRNA-seq	Eif3m
scRNA-seq	1110012L19Rik
scRNA-seq	Rfc3
scRNA-seq	Epb41l4b
scRNA-seq	Hmgn5
scRNA-seq	Rpl37
scRNA-seq	Stk31
scRNA-seq	Tceal9
scRNA-seq	Col13a1
scRNA-seq	Zfp131
scRNA-seq	Rsbn1l
scRNA-seq	Tm2d1
scRNA-seq	Gm26735
scRNA-seq	Mis18a
scRNA-seq	Plxdc2
scRNA-seq	Paip1
scRNA-seq	1700042G07Rik
scRNA-seq	Mtus1
scRNA-seq	Prpf6
scRNA-seq	Rab1a
scRNA-seq	Zfp637
scRNA-seq	Ythdf2
scRNA-seq	Lonp2
scRNA-seq	Pla2g7
scRNA-seq	Nup188
scRNA-seq	Ccnd3
scRNA-seq	Morf4l2
scRNA-seq	Chm
scRNA-seq	Per3
scRNA-seq	Smoc2
scRNA-seq	Smap1
scRNA-seq	Wdr75
scRNA-seq	Tomm5
scRNA-seq	Rbfa
scRNA-seq	Phf13
scRNA-seq	Copb1
scRNA-seq	Urm1
scRNA-seq	Kdm2a
scRNA-seq	Rbm48
scRNA-seq	Cul3
scRNA-seq	Nemf
scRNA-seq	Glg1
scRNA-seq	Mef2d
scRNA-seq	Eml4
scRNA-seq	Akap13
scRNA-seq	Txndc11
scRNA-seq	Dpm1
scRNA-seq	Gstt4
scRNA-seq	Nck1
scRNA-seq	Aig1
scRNA-seq	Plekha5
scRNA-seq	Cenpp
scRNA-seq	Nup98
scRNA-seq	2810408A11Rik
scRNA-seq	Ctnnb1
scRNA-seq	Atf7
scRNA-seq	Tiparp
scRNA-seq	Zfp407
scRNA-seq	Cpeb2
scRNA-seq	Eif3h
scRNA-seq	Bhlhe41
scRNA-seq	Rpgrip1l
scRNA-seq	Rel
scRNA-seq	Phf21a
scRNA-seq	Epc1
scRNA-seq	Atxn10
scRNA-seq	Sf3b1
scRNA-seq	Psmc1
scRNA-seq	Esf1
scRNA-seq	Fth1
scRNA-seq	Zfp330
scRNA-seq	Pip4k2a
scRNA-seq	Gm19395
scRNA-seq	Gas2l3
scRNA-seq	Rhoh
scRNA-seq	Papd5
scRNA-seq	Fam96b
scRNA-seq	Znrf4
scRNA-seq	Fam71f2
scRNA-seq	Bmt2
scRNA-seq	Sh2d3c
scRNA-seq	Stk35
scRNA-seq	Crebzf
scRNA-seq	Limk2
scRNA-seq	Smc4
scRNA-seq	Brd4
scRNA-seq	Rbm26
scRNA-seq	Cabs1
scRNA-seq	Nup133
scRNA-seq	Pgm2l1
scRNA-seq	Ptpn14
scRNA-seq	Lims1
scRNA-seq	Spag1
scRNA-seq	Cyp2u1
scRNA-seq	Tjap1
scRNA-seq	Smc1b
scRNA-seq	Foxn3
scRNA-seq	Acat1
scRNA-seq	Prdm16
scRNA-seq	Pam
scRNA-seq	Mpp5
scRNA-seq	Fut8
scRNA-seq	Coq10b
scRNA-seq	Syne2
scRNA-seq	Jph4
scRNA-seq	Nfu1
scRNA-seq	Bnip3l
scRNA-seq	Arhgef18
scRNA-seq	Dhx36
scRNA-seq	Tbce
scRNA-seq	Phf10
scRNA-seq	Adad1
scRNA-seq	Zfp213
scRNA-seq	Sept1
scRNA-seq	Ccser2
scRNA-seq	Supt5
scRNA-seq	Nfrkb
scRNA-seq	Gpd2
scRNA-seq	Tox4
scRNA-seq	Sh3glb2
scRNA-seq	Dag1
scRNA-seq	Prmt7
scRNA-seq	Txndc8
scRNA-seq	Ndufv3
scRNA-seq	Bnip2
scRNA-seq	Glyr1
scRNA-seq	Tex48
scRNA-seq	Entpd6
scRNA-seq	Med28
scRNA-seq	Cenpq
scRNA-seq	Atg12
scRNA-seq	Zfp462
scRNA-seq	Nmb
scRNA-seq	Epb41l5
scRNA-seq	Neil2
scRNA-seq	Slc25a4
scRNA-seq	Surf4
scRNA-seq	Ubash3b
scRNA-seq	Zfp790
scRNA-seq	Ddx3y
scRNA-seq	Ctnnbip1
scRNA-seq	Pmaip1
scRNA-seq	Eva1b
scRNA-seq	Insig2
scRNA-seq	Pex7
scRNA-seq	Jmjd1c
scRNA-seq	Prkcq
scRNA-seq	1110038F14Rik
scRNA-seq	Ralgapb
scRNA-seq	Cdc26
scRNA-seq	Dnajc13
scRNA-seq	Ep300
scRNA-seq	Ncoa6
scRNA-seq	Bex3
scRNA-seq	Plcb4
scRNA-seq	Pak1
scRNA-seq	Lhx1
scRNA-seq	Ddx42
scRNA-seq	Hdgfl3
scRNA-seq	Brca2
scRNA-seq	Zfand4
scRNA-seq	Dopey1
scRNA-seq	Nexn
scRNA-seq	Tjp2
scRNA-seq	Crbn
scRNA-seq	Ube2q2
scRNA-seq	Phldb1
scRNA-seq	Brwd3
scRNA-seq	Cdc42bpa
scRNA-seq	Usp37
scRNA-seq	Med1
scRNA-seq	Mcm3
scRNA-seq	Ncor2
scRNA-seq	Smyd4
scRNA-seq	Lrriq3
scRNA-seq	Exoc6b
scRNA-seq	Mysm1
scRNA-seq	Eif4e
scRNA-seq	1700029I15Rik
scRNA-seq	Gmpr
scRNA-seq	Pigx
scRNA-seq	Pdcd7
scRNA-seq	Atg5
scRNA-seq	Tcf20
scRNA-seq	Tmx4
scRNA-seq	Tlk2
scRNA-seq	Crnkl1
scRNA-seq	Alkbh1
scRNA-seq	Mob4
scRNA-seq	Acot13
scRNA-seq	Ccdc186
scRNA-seq	Rab18
scRNA-seq	Crebrf
scRNA-seq	Mboat2
scRNA-seq	Trnau1ap
scRNA-seq	Klk8
scRNA-seq	Epb41
scRNA-seq	Zfp958
scRNA-seq	Rap1a
scRNA-seq	Aspm
scRNA-seq	Nol7
scRNA-seq	Erlin2
scRNA-seq	C87436
scRNA-seq	Ccdc114
scRNA-seq	Tle4
scRNA-seq	Rnf130
scRNA-seq	Ryk
scRNA-seq	1700001L19Rik
scRNA-seq	Med24
scRNA-seq	Herc1
scRNA-seq	Usp12
scRNA-seq	Aplp1
scRNA-seq	Tamm41
scRNA-seq	Tcea1
scRNA-seq	Timm17b
scRNA-seq	Arhgap35
scRNA-seq	Commd1
scRNA-seq	Klf13
scRNA-seq	Arhgap17
scRNA-seq	Dtna
scRNA-seq	Stk24
scRNA-seq	Tfdp1
scRNA-seq	Epc2
scRNA-seq	Fosb
scRNA-seq	1700006E09Rik
scRNA-seq	Selenot
scRNA-seq	Fam91a1
scRNA-seq	Rsrp1
scRNA-seq	Tmem33
scRNA-seq	Rrp15
scRNA-seq	Gid4
scRNA-seq	Ccdc18
scRNA-seq	Hhex
scRNA-seq	Ptbp2
scRNA-seq	Mau2
scRNA-seq	A430005L14Rik
scRNA-seq	Nars
scRNA-seq	Usp53
scRNA-seq	Tead1
scRNA-seq	Kpna1
scRNA-seq	Baz2a
scRNA-seq	Cltc
scRNA-seq	Tslrn1
scRNA-seq	Ccdc138
scRNA-seq	Adprh
scRNA-seq	Helb
scRNA-seq	Rnf212
scRNA-seq	Yipf6
scRNA-seq	Dync2h1
scRNA-seq	Ifngr1
scRNA-seq	Map4k3
scRNA-seq	Dusp6
scRNA-seq	Zbtb25
scRNA-seq	Kdelr1
scRNA-seq	Dopey2
scRNA-seq	Esrp1
scRNA-seq	Gipc1
scRNA-seq	Tial1
scRNA-seq	N4bp2l2
scRNA-seq	Depdc7
scRNA-seq	Ctdspl2
scRNA-seq	Hps4
scRNA-seq	Commd7
scRNA-seq	Erp29
scRNA-seq	Actr3
scRNA-seq	Usp44
scRNA-seq	Atp6v1e2
scRNA-seq	Nxf1
scRNA-seq	Gatd1
scRNA-seq	Dph5
scRNA-seq	BC005537
scRNA-seq	Mff
scRNA-seq	Mex3c
scRNA-seq	Zranb2
scRNA-seq	Abhd6
scRNA-seq	Lmna
scRNA-seq	Sptlc2
scRNA-seq	Hars
scRNA-seq	Itpk1
scRNA-seq	Brd8
scRNA-seq	Zfand6
scRNA-seq	Samhd1
scRNA-seq	Zic1
scRNA-seq	Pgap2
scRNA-seq	Serpini1
scRNA-seq	Ckap2l
scRNA-seq	Clcc1
scRNA-seq	Ttc33
scRNA-seq	Bub1b
scRNA-seq	Slfnl1
scRNA-seq	Mastl
scRNA-seq	Cdk13
scRNA-seq	Gtf2h2
scRNA-seq	Ascc3
scRNA-seq	Ppm1a
scRNA-seq	Mtch2
scRNA-seq	Sult5a1
scRNA-seq	Tmem57
scRNA-seq	Apoe
scRNA-seq	Git2
scRNA-seq	Socs3
scRNA-seq	Tmbim1
scRNA-seq	Cenpe
scRNA-seq	Arel1
scRNA-seq	Gskip
scRNA-seq	Cited2
scRNA-seq	Med14
scRNA-seq	Aak1
scRNA-seq	Sdccag3
scRNA-seq	Amn1
scRNA-seq	Zfp90
scRNA-seq	Mpzl2
scRNA-seq	Otub1
scRNA-seq	Trap1a
scRNA-seq	Pdcd6
scRNA-seq	Atf7ip
scRNA-seq	Optn
scRNA-seq	Bcl2l1
scRNA-seq	Ap3d1
scRNA-seq	Cyb5r1
scRNA-seq	Dnaja3
scRNA-seq	AU041133
scRNA-seq	Lcorl
scRNA-seq	Tsc1
scRNA-seq	Mtpap
scRNA-seq	Cisd2
scRNA-seq	Xrn1
scRNA-seq	Mettl1
scRNA-seq	Atg4b
scRNA-seq	Ube2g2
scRNA-seq	Git1
scRNA-seq	Hmgcs1
scRNA-seq	Dnajc1
scRNA-seq	4932438A13Rik
scRNA-seq	Bsdc1
scRNA-seq	Bfar
scRNA-seq	Zfp318
scRNA-seq	1700020I14Rik
scRNA-seq	Gfm2
scRNA-seq	Ctsa
scRNA-seq	Serinc3
scRNA-seq	Cenph
scRNA-seq	Tmem247
scRNA-seq	Atp6v1c1
scRNA-seq	0610009B22Rik
scRNA-seq	Mef2a
scRNA-seq	Mrpl33
scRNA-seq	Meg3
scRNA-seq	Ift122
scRNA-seq	Gnpda2
scRNA-seq	Samm50
scRNA-seq	Wasf1
scRNA-seq	Phc1
scRNA-seq	Cars2
scRNA-seq	Itch
scRNA-seq	Hat1
scRNA-seq	Nras
scRNA-seq	Stk36
scRNA-seq	Ift88
scRNA-seq	Hscb
scRNA-seq	Wdsub1
scRNA-seq	Cd2bp2
scRNA-seq	Mettl14
scRNA-seq	Gltp
scRNA-seq	Pmfbp1
scRNA-seq	Vps13b
scRNA-seq	Mrpl30
scRNA-seq	Marc2
scRNA-seq	Col4a3bp
scRNA-seq	Rab5b
scRNA-seq	Sesn2
scRNA-seq	Ube2h
scRNA-seq	Myl12b
scRNA-seq	Pitrm1
scRNA-seq	Casp9
scRNA-seq	Etv4
scRNA-seq	Btg1
scRNA-seq	Mypop
scRNA-seq	Rbbp8
scRNA-seq	Xlr3c
scRNA-seq	Pcmtd2
scRNA-seq	Plekhb2
scRNA-seq	Epb41l2
scRNA-seq	Rnf149
scRNA-seq	Uba3
scRNA-seq	Napa
scRNA-seq	Pkn2
scRNA-seq	Usp9x
scRNA-seq	Rbm10
scRNA-seq	Arfgap3
scRNA-seq	Orc6
scRNA-seq	Slu7
scRNA-seq	Atox1
scRNA-seq	Smim7
scRNA-seq	Acbd3
scRNA-seq	Cecr2
scRNA-seq	Selenoh
scRNA-seq	Rfk
scRNA-seq	Cpsf7
scRNA-seq	Fam221b
scRNA-seq	Lpp
scRNA-seq	Mfap1a
scRNA-seq	Clstn1
scRNA-seq	Tsg101
scRNA-seq	Tmem80
scRNA-seq	C2cd5
scRNA-seq	Stk4
scRNA-seq	Acads
scRNA-seq	Dennd5b
scRNA-seq	Defb19
scRNA-seq	Cldnd1
scRNA-seq	Bin2
scRNA-seq	Mettl23
scRNA-seq	Senp2
scRNA-seq	Atp6v1e1
scRNA-seq	Cdc42se2
scRNA-seq	Asphd2
scRNA-seq	Zfp667
scRNA-seq	Zdhhc21
scRNA-seq	Rspry1
scRNA-seq	Ptprd
scRNA-seq	Gps1
scRNA-seq	Tmem60
scRNA-seq	Xpc
scRNA-seq	Smad4
scRNA-seq	Tmem29
scRNA-seq	Dcakd
scRNA-seq	Robo1
scRNA-seq	Zfp787
scRNA-seq	Bmp7
scRNA-seq	Las1l
scRNA-seq	Wdr70
scRNA-seq	Camk1d
scRNA-seq	Ubr2
scRNA-seq	Triobp
scRNA-seq	Nucks1
scRNA-seq	March2
scRNA-seq	Ist1
scRNA-seq	Rad18
scRNA-seq	Med7
scRNA-seq	Rad51
scRNA-seq	Anapc1
scRNA-seq	Soat1
scRNA-seq	Enho
scRNA-seq	Junb
scRNA-seq	Mbnl1
scRNA-seq	Kin
scRNA-seq	Wdr89
scRNA-seq	Tle3
scRNA-seq	D10Wsu102e
scRNA-seq	Pclaf
scRNA-seq	Nt5c1b
scRNA-seq	Bet1l
scRNA-seq	Mcl1
scRNA-seq	Letm2
scRNA-seq	Iqub
scRNA-seq	Enkur
scRNA-seq	Tacc1
scRNA-seq	Hsf2bp
scRNA-seq	Nbeal1
scRNA-seq	Zbtb11
scRNA-seq	Negr1
scRNA-seq	Csnk1e
scRNA-seq	Dtwd1
scRNA-seq	Exoc5
scRNA-seq	Asxl3
scRNA-seq	Hmox1
scRNA-seq	3110082I17Rik
scRNA-seq	Dcun1d1
scRNA-seq	Csnk1d
scRNA-seq	Gm773
scRNA-seq	Fam168b
scRNA-seq	Mapk1ip1l
scRNA-seq	Napg
scRNA-seq	Ctnna1
scRNA-seq	Scaf1
scRNA-seq	Prim2
scRNA-seq	Taok3
scRNA-seq	Pdha1
scRNA-seq	Rbpms2
scRNA-seq	Top2b
scRNA-seq	Chchd3
scRNA-seq	Ube3c
scRNA-seq	Golph3l
scRNA-seq	E2f1
scRNA-seq	Vbp1
scRNA-seq	Cfap53
scRNA-seq	Csad
scRNA-seq	Shroom3
scRNA-seq	Itpr3
scRNA-seq	Ldhb
scRNA-seq	Wbscr25
scRNA-seq	Irf2bpl
scRNA-seq	Bambi
scRNA-seq	Pan3
scRNA-seq	Epcam
scRNA-seq	Kdm2b
scRNA-seq	Col22a1
scRNA-seq	Bc1

## Sheet: B
ID	Description	GeneRatio	BgRatio	pvalue	p.adjust	qvalue
GO:0051098	regulation of binding	41/877	399/23174	7.79207e-09	3.71993e-05	3.05777e-05
GO:0019827	stem cell population maintenance	24/877	165/23174	1.58958e-08	3.79433e-05	3.11893e-05
GO:0098727	maintenance of cell number	24/877	169/23174	2.55665e-08	4.06848e-05	3.34428e-05
GO:0034248	regulation of cellular amide metabolic process	38/877	375/23174	3.98559e-08	4.75681e-05	3.91008e-05
GO:0001701	in utero embryonic development	45/877	498/23174	7.20133e-08	5.75074e-05	4.72709e-05
GO:0007346	regulation of mitotic cell cycle	43/877	492/23174	3.51954e-07	0.000181057	0.000148828
GO:0006417	regulation of translation	33/877	329/23174	3.91228e-07	0.000181057	0.000148828
GO:0060562	epithelial tube morphogenesis	36/877	378/23174	4.17182e-07	0.000181057	0.000148828
GO:0006397	mRNA processing	39/877	445/23174	1.14793e-06	0.000456686	0.000375394
GO:0002181	cytoplasmic translation	15/877	92/23174	1.79318e-06	0.000658512	0.000541295
GO:0007059	chromosome segregation	30/877	313/23174	3.32767e-06	0.00113473	0.000932748
GO:0007264	small GTPase mediated signal transduction	40/877	485/23174	3.78134e-06	0.00113611	0.000933881
GO:0030900	forebrain development	34/877	383/23174	4.17462e-06	0.00117233	0.000963653
GO:0006605	protein targeting	26/877	256/23174	5.22587e-06	0.00127984	0.00105203
GO:0035051	cardiocyte differentiation	21/877	181/23174	5.36172e-06	0.00127984	0.00105203
GO:0072594	establishment of protein localization to organelle	33/877	374/23174	6.54678e-06	0.00144929	0.00119131
GO:0071560	cellular response to transforming growth factor beta stimulus	22/877	204/23174	1.05862e-05	0.00219733	0.0018062
GO:0021915	neural tube development	21/877	190/23174	1.1445e-05	0.0022766	0.00187135
GO:0071559	response to transforming growth factor beta	22/877	208/23174	1.44073e-05	0.00275122	0.00226149
GO:0048382	mesendoderm development	5/877	10/23174	1.65025e-05	0.00303011	0.00249074
GO:1903320	regulation of protein modification by small protein conjugation or removal	23/877	229/23174	2.15026e-05	0.0036662	0.0030136
GO:0043161	proteasome-mediated ubiquitin-dependent protein catabolic process	32/877	390/23174	3.81734e-05	0.0058787	0.00483227
GO:0090150	establishment of protein localization to membrane	22/877	222/23174	3.9558e-05	0.00590156	0.00485106
GO:0006281	DNA repair	36/877	464/23174	4.19739e-05	0.00607222	0.00499134
GO:0032868	response to insulin	22/877	224/23174	4.53271e-05	0.00636446	0.00523156
GO:0051647	nucleus localization	8/877	37/23174	5.92516e-05	0.00744387	0.00611883
GO:0043543	protein acylation	22/877	231/23174	7.19149e-05	0.00798423	0.00656301
GO:0006913	nucleocytoplasmic transport	25/877	287/23174	0.000102519	0.0106397	0.0087458
GO:0051169	nuclear transport	25/877	287/23174	0.000102519	0.0106397	0.0087458
GO:1990778	protein localization to cell periphery	28/877	342/23174	0.000118384	0.0110996	0.0091238
GO:0043967	histone H4 acetylation	10/877	63/23174	0.000118607	0.0110996	0.0091238
GO:0051983	regulation of chromosome segregation	13/877	102/23174	0.000124544	0.0111137	0.0091354
GO:0007498	mesoderm development	14/877	116/23174	0.00012571	0.0111137	0.0091354
GO:0032869	cellular response to insulin stimulus	19/877	192/23174	0.000132459	0.0113523	0.00933156
GO:0006979	response to oxidative stress	31/877	401/23174	0.000149337	0.0122048	0.0100323
GO:0000819	sister chromatid segregation	18/877	178/23174	0.00015006	0.0122048	0.0100323
GO:0006260	DNA replication	22/877	243/23174	0.000150835	0.0122048	0.0100323
GO:0007097	nuclear migration	7/877	32/23174	0.000159451	0.012479	0.0102577
GO:0000280	nuclear division	31/877	403/23174	0.000163182	0.012565	0.0103284
GO:0060271	cilium assembly	25/877	297/23174	0.00017544	0.0130867	0.0107572
GO:1905515	non-motile cilium assembly	10/877	67/23174	0.000200844	0.0147512	0.0121254
GO:0033044	regulation of chromosome organization	28/877	354/23174	0.000210686	0.0150881	0.0124024
GO:0033045	regulation of sister chromatid segregation	11/877	81/23174	0.000231228	0.0157697	0.0129627
GO:0042158	lipoprotein biosynthetic process	12/877	95/23174	0.00024443	0.0163387	0.0134303
GO:0042326	negative regulation of phosphorylation	33/877	451/23174	0.000256509	0.0167677	0.013783
GO:0051668	localization within membrane	18/877	186/23174	0.00025991	0.0167677	0.013783
GO:0051656	establishment of organelle localization	34/877	474/23174	0.000300347	0.0179657	0.0147677
GO:0050680	negative regulation of epithelial cell proliferation	15/877	141/23174	0.000301059	0.0179657	0.0147677
GO:0010256	endomembrane system organization	29/877	381/23174	0.000311908	0.0182066	0.0149657
GO:1904019	epithelial cell apoptotic process	13/877	113/23174	0.000349332	0.0196201	0.0161277
GO:0022027	interkinetic nuclear migration	4/877	10/23174	0.000356333	0.0197806	0.0162596
GO:0016569	covalent chromatin modification	32/877	443/23174	0.000395535	0.0214578	0.0176382
GO:0090316	positive regulation of intracellular protein transport	14/877	131/23174	0.000451322	0.0236786	0.0194637
GO:0031503	protein-containing complex localization	21/877	247/23174	0.000492187	0.0249968	0.0205473
GO:0010171	body morphogenesis	9/877	62/23174	0.000512431	0.0254828	0.0209468
GO:0034508	centromere complex assembly	6/877	28/23174	0.000532362	0.0261214	0.0214717
GO:0008360	regulation of cell shape	15/877	149/23174	0.000544198	0.0261214	0.0214717
GO:1904375	regulation of protein localization to cell periphery	14/877	134/23174	0.000567835	0.026535	0.0218117
GO:0034599	cellular response to oxidative stress	22/877	268/23174	0.000589173	0.026535	0.0218117
GO:0061351	neural precursor cell proliferation	17/877	183/23174	0.000610691	0.0270726	0.0222536
GO:0017145	stem cell division	8/877	51/23174	0.000612451	0.0270726	0.0222536
GO:0043547	positive regulation of GTPase activity	19/877	217/23174	0.000626513	0.0274401	0.0225557
GO:0009062	fatty acid catabolic process	11/877	91/23174	0.000641219	0.0278289	0.0228752
GO:0009611	response to wounding	34/877	495/23174	0.00065132	0.0278948	0.0229294
GO:0032386	regulation of intracellular transport	31/877	437/23174	0.000654423	0.0278948	0.0229294
GO:0060840	artery development	12/877	106/23174	0.000674253	0.0280452	0.0230531
GO:0044782	cilium organization	25/877	325/23174	0.000675576	0.0280452	0.0230531
GO:0051052	regulation of DNA metabolic process	31/877	439/23174	0.00070551	0.0285433	0.0234625
GO:1905475	regulation of protein localization to membrane	17/877	186/23174	0.0007342	0.0294544	0.0242114
GO:0031032	actomyosin structure organization	18/877	203/23174	0.000743065	0.0295616	0.0242995
GO:0042157	lipoprotein metabolic process	13/877	123/23174	0.000791199	0.0309605	0.0254494
GO:0032922	circadian regulation of gene expression	9/877	66/23174	0.000817376	0.0317248	0.0260777
GO:0031647	regulation of protein stability	22/877	275/23174	0.000830125	0.0317707	0.0261154
GO:0071383	cellular response to steroid hormone stimulus	15/877	156/23174	0.000878581	0.0317707	0.0261154
GO:0016239	positive regulation of macroautophagy	9/877	67/23174	0.000913044	0.0317707	0.0261154
GO:0022613	ribonucleoprotein complex biogenesis	30/877	427/23174	0.000925036	0.0317707	0.0261154
GO:0198738	cell-cell signaling by wnt	30/877	427/23174	0.000925036	0.0317707	0.0261154
GO:0006352	DNA-templated transcription, initiation	11/877	96/23174	0.00100757	0.0336372	0.0276497
GO:0048863	stem cell differentiation	19/877	227/23174	0.00107649	0.0341239	0.0280497
GO:0071103	DNA conformation change	18/877	210/23174	0.00109911	0.0341239	0.0280497
GO:0007183	SMAD protein complex assembly	4/877	13/23174	0.00110772	0.0341239	0.0280497
GO:0000209	protein polyubiquitination	17/877	193/23174	0.00110792	0.0341239	0.0280497
GO:0098876	vesicle-mediated transport to the plasma membrane	11/877	98/23174	0.00119583	0.0352401	0.0289673
GO:2000036	regulation of stem cell population maintenance	6/877	33/23174	0.00133241	0.0378628	0.0311231
GO:0009896	positive regulation of catabolic process	29/877	418/23174	0.00135236	0.0382021	0.031402
GO:1903306	negative regulation of regulated secretory pathway	5/877	23/23174	0.0014624	0.0400864	0.0329509
GO:0048194	Golgi vesicle budding	6/877	34/23174	0.0015668	0.0417872	0.034349
GO:0030258	lipid modification	18/877	217/23174	0.00159121	0.042079	0.0345888
GO:0071826	ribonucleoprotein complex subunit organization	19/877	235/23174	0.001613	0.042079	0.0345888
GO:0030100	regulation of endocytosis	22/877	290/23174	0.00164587	0.0427031	0.0351018
GO:0051321	meiotic cell cycle	23/877	309/23174	0.00167441	0.0430156	0.0353587
GO:0097327	response to antineoplastic agent	9/877	73/23174	0.0016955	0.0430549	0.035391
GO:0009895	negative regulation of catabolic process	22/877	292/23174	0.00179437	0.0446512	0.0367031
GO:1903018	regulation of glycoprotein metabolic process	7/877	47/23174	0.00182139	0.0449269	0.0369298
GO:0140014	mitotic nuclear division	20/877	256/23174	0.00185748	0.0452381	0.0371855
GO:1905897	regulation of response to endoplasmic reticulum stress	9/877	74/23174	0.00186676	0.0452381	0.0371855
GO:0006403	RNA localization	15/877	169/23174	0.00196445	0.0464272	0.038163
GO:0010917	negative regulation of mitochondrial membrane potential	4/877	15/23174	0.0019907	0.0465667	0.0382776
GO:0071243	cellular response to arsenic-containing substance	4/877	15/23174	0.0019907	0.0465667	0.0382776
GO:0061951	establishment of protein localization to plasma membrane	8/877	61/23174	0.00203288	0.0467544	0.038432
GO:1905207	regulation of cardiocyte differentiation	8/877	61/23174	0.00203288	0.0467544	0.038432
GO:0000956	nuclear-transcribed mRNA catabolic process	11/877	105/23174	0.00209582	0.0467544	0.038432
GO:0048738	cardiac muscle tissue development	20/877	259/23174	0.00212956	0.0468502	0.0385107
GO:0031440	regulation of mRNA 3'-end processing	5/877	25/23174	0.00216894	0.0470167	0.0386475
GO:2000737	negative regulation of stem cell differentiation	5/877	25/23174	0.00216894	0.0470167	0.0386475
GO:2001233	regulation of apoptotic signaling pathway	28/877	412/23174	0.00218636	0.0470167	0.0386475
GO:0032259	methylation	24/877	335/23174	0.00223001	0.0477005	0.0392096
GO:0051348	negative regulation of transferase activity	19/877	242/23174	0.0022538	0.0477005	0.0392096
GO:1905818	regulation of chromosome separation	8/877	62/23174	0.00225813	0.0477005	0.0392096
GO:0044772	mitotic cell cycle phase transition	25/877	355/23174	0.00230045	0.0483803	0.0397684
