# Supplementary material for: Identification of quiescent FOXC2+ spermatogonial stem cells in adult mammals
Source: eLife. 2023 Aug 23;12:RP85380. doi: 10.7554/eLife.85380 (PMC10446825; doi:10.7554/eLife.85380)
Supplement: Figure 7—source data 1. [file elife-85380-fig7-data1.xlsx]

## Sheet: list
sheet	legend
A	DEGs
B	GO

## Sheet: A
Venny	DEG
scRNA-seq	Rest
scRNA-seq	Pdzd2
scRNA-seq	Ptpn13
scRNA-seq	Foxc2
scRNA-seq	Gfra1
scRNA-seq	Jak1
scRNA-seq	Rpl21
scRNA-seq	Usp34
scRNA-seq	Gm36028
scRNA-seq	Ret
scRNA-seq	Gm42418
scRNA-seq	Rpl22l1
scRNA-seq	Scmh1
scRNA-seq	Malat1
scRNA-seq	G2e3
scRNA-seq	Rpl39l
scRNA-seq	Fst
scRNA-seq	Tcl1
scRNA-seq	Prpsap1
scRNA-seq	Tspan8
scRNA-seq	Nefm
scRNA-seq	Rasl11a
scRNA-seq	Prm3
scRNA-seq	Nrxn2
scRNA-seq	Tnrc6c
scRNA-seq	Itm2c
scRNA-seq	Rpl31
scRNA-seq	Irx1
scRNA-seq	Syn2
scRNA-seq	Aaed1
scRNA-seq	Mprip
scRNA-seq	Bod1l
scRNA-seq	Rps29
scRNA-seq	Dync1i2
scRNA-seq	Fgd5
scRNA-seq	Gm36899
scRNA-seq	Hectd1
scRNA-seq	Ccdc174
scRNA-seq	Abca1
scRNA-seq	Bri3
scRNA-seq	Tox3
scRNA-seq	Barhl2
scRNA-seq	Atxn1
scRNA-seq	Sun3
scRNA-seq	Rpsa
scRNA-seq	Rab4a
scRNA-seq	Shisa2
scRNA-seq	Lhx2
scRNA-seq	Cox6b1
scRNA-seq	Chd4
scRNA-seq	Arpc3
scRNA-seq	Batf
scRNA-seq	Cox7a2l
scRNA-seq	Map4k4
scRNA-seq	Cab39
scRNA-seq	Tbc1d4
scRNA-seq	Zfp36l1
scRNA-seq	Odf1
scRNA-seq	Med13l
scRNA-seq	Pqlc1
scRNA-seq	Dstn
scRNA-seq	Rpl32
scRNA-seq	Tagln2
scRNA-seq	Wwp1
scRNA-seq	Afdn
scRNA-seq	Snrpf
scRNA-seq	Arhgap26
scRNA-seq	Mcam
scRNA-seq	Cbx7
scRNA-seq	Zbtb20
scRNA-seq	Gna13
scRNA-seq	Ppfibp2
scRNA-seq	Nub1
scRNA-seq	Mfsd4a
scRNA-seq	Rbpms
scRNA-seq	Cbln2
scRNA-seq	Tsc22d3
scRNA-seq	Ssbp2
scRNA-seq	Phip
scRNA-seq	Eif4g3
scRNA-seq	Igfbp5
scRNA-seq	Eomes
scRNA-seq	Mpped2
scRNA-seq	Fnbp1l
scRNA-seq	Foxp1
scRNA-seq	Atad2
scRNA-seq	Ctsl
scRNA-seq	Zzz3
scRNA-seq	Aplp2
scRNA-seq	Tulp2
scRNA-seq	Atp5g2
scRNA-seq	Fyn
scRNA-seq	Vamp3
scRNA-seq	Pfdn1
scRNA-seq	Glo1
scRNA-seq	Mterf4
scRNA-seq	Tpm1
scRNA-seq	Usf1
scRNA-seq	Nfyb
scRNA-seq	Ptbp3
scRNA-seq	Selenok
scRNA-seq	Plvap
scRNA-seq	Chn2
scRNA-seq	Ilvbl
scRNA-seq	Gm29243
scRNA-seq	Zfp36l2
scRNA-seq	Nid1
scRNA-seq	Tanc1
scRNA-seq	Naa35
scRNA-seq	Rasgrp2
scRNA-seq	Fuca1
scRNA-seq	Krtap17-1
scRNA-seq	Cyp2a12
scRNA-seq	Fam32a
scRNA-seq	Zcrb1
scRNA-seq	Dmrt2
scRNA-seq	Timm17a
scRNA-seq	Vamp4
scRNA-seq	Sptbn1
scRNA-seq	Wapl
scRNA-seq	Cdv3
scRNA-seq	Midn
scRNA-seq	Pbrm1
scRNA-seq	Frg1
scRNA-seq	Akirin1
scRNA-seq	Ssbp3
scRNA-seq	Magi3
scRNA-seq	Hlf
scRNA-seq	Zfp449
scRNA-seq	Rps15a
scRNA-seq	Sox4
scRNA-seq	Pdx1
scRNA-seq	R3hdm2
scRNA-seq	Pik3ca
scRNA-seq	Grasp
scRNA-seq	Rps7
scRNA-seq	Sphk1
scRNA-seq	Noct
scRNA-seq	Yeats4
scRNA-seq	Rbm39
scRNA-seq	Rnf44
scRNA-seq	Rlim
scRNA-seq	Dnajc24
scRNA-seq	1700017B05Rik
scRNA-seq	Txnip
scRNA-seq	Fastkd2
scRNA-seq	Pcm1
scRNA-seq	D430019H16Rik
scRNA-seq	Gdi2
scRNA-seq	Inpp5f
scRNA-seq	Cnn2
scRNA-seq	Golgb1
scRNA-seq	Dusp5
scRNA-seq	Hipk1
scRNA-seq	Frmd6
scRNA-seq	Pbx1
scRNA-seq	Ddx46
scRNA-seq	Fam222b
scRNA-seq	Sem1
scRNA-seq	Auts2
scRNA-seq	Myo18a
scRNA-seq	Tra2a
scRNA-seq	Ensa
scRNA-seq	Rpl15
scRNA-seq	B430010I23Rik
scRNA-seq	Slc3a2
scRNA-seq	Barx1
scRNA-seq	Cenpa
scRNA-seq	Ppp1cb
scRNA-seq	Helz
scRNA-seq	Rasa1
scRNA-seq	Elavl2
scRNA-seq	Adgrl2
scRNA-seq	Wipi1
scRNA-seq	Phf3
scRNA-seq	Col18a1
scRNA-seq	Acp1
scRNA-seq	Rpl35a
scRNA-seq	Rnf122
scRNA-seq	Id4
scRNA-seq	Egr1
scRNA-seq	Rps27
scRNA-seq	Sec63
scRNA-seq	Dnajc19
scRNA-seq	Hjurp
scRNA-seq	Gm8126
scRNA-seq	Ubald2
scRNA-seq	Tfam
scRNA-seq	Pnisr
scRNA-seq	Caly
scRNA-seq	Cdk2ap2
scRNA-seq	Rpl4
scRNA-seq	Ypel5
scRNA-seq	Rras
scRNA-seq	Hes1
scRNA-seq	2700062C07Rik
scRNA-seq	Taf7
scRNA-seq	Mpdz
scRNA-seq	Styx
scRNA-seq	Jun
scRNA-seq	Sbno1
scRNA-seq	Tmc6
scRNA-seq	Ndufa10
scRNA-seq	Itga6
scRNA-seq	Fzd10
scRNA-seq	Pdk1
scRNA-seq	Tjp1
scRNA-seq	Ccdc34
scRNA-seq	Zdhhc14
scRNA-seq	Fam217a
scRNA-seq	Glis3
scRNA-seq	Upf2
scRNA-seq	Usp7
scRNA-seq	Med31
scRNA-seq	Asap1
scRNA-seq	Med21
scRNA-seq	Trp53bp1
scRNA-seq	2900026A02Rik
scRNA-seq	Rab5c
scRNA-seq	Dst
scRNA-seq	Zwilch
scRNA-seq	Etv5
scRNA-seq	Tmem132c
scRNA-seq	Cd151
scRNA-seq	Nusap1
scRNA-seq	Lpin2
scRNA-seq	Fos
scRNA-seq	Cst3
scRNA-seq	Slc9a3r1
scRNA-seq	1700041G16Rik
scRNA-seq	Rrbp1
scRNA-seq	Epn1
scRNA-seq	Lsm5
scRNA-seq	Ipo5
scRNA-seq	St6galnac2
scRNA-seq	Terf1
scRNA-seq	Ift80
scRNA-seq	Vps13d
scRNA-seq	Cnnm1
scRNA-seq	Zc3h15
scRNA-seq	Sfr1
scRNA-seq	Mad2l1
scRNA-seq	Paip2
scRNA-seq	Nrd1
scRNA-seq	Slc38a1
scRNA-seq	Pdzd8
scRNA-seq	Wwtr1
scRNA-seq	Spata46
scRNA-seq	Irf2
scRNA-seq	Cyb5a
scRNA-seq	Dnajc10
scRNA-seq	Zfp512
scRNA-seq	Virma
scRNA-seq	Smcp
scRNA-seq	Bclaf3
scRNA-seq	Pdcd10
scRNA-seq	E130102H24Rik
scRNA-seq	Scp2
scRNA-seq	Coa3
scRNA-seq	Dgkk
scRNA-seq	Asf1a
scRNA-seq	Tdrd7
scRNA-seq	Med8
scRNA-seq	BC055324
scRNA-seq	Cep295
scRNA-seq	Scarb2
scRNA-seq	Sp3os
scRNA-seq	Arrb2
scRNA-seq	Hadhb
scRNA-seq	Spert
scRNA-seq	Efhb
scRNA-seq	Csde1
scRNA-seq	Sec62
scRNA-seq	Chn1
scRNA-seq	Ndufaf2
scRNA-seq	Ubn2
scRNA-seq	Setd5
scRNA-seq	Rpl39
scRNA-seq	Rpap3
scRNA-seq	Gin1
scRNA-seq	Rpl37a
scRNA-seq	Rab2a
scRNA-seq	Slc39a11
scRNA-seq	Dppa4
scRNA-seq	Slk
scRNA-seq	Gng5
scRNA-seq	Spata5
scRNA-seq	Cln5
scRNA-seq	Pomp
scRNA-seq	Disp1
scRNA-seq	Mtmr7
scRNA-seq	Pacsin2
scRNA-seq	Cd164
scRNA-seq	Arhgap31
scRNA-seq	Akirin2
scRNA-seq	Rpl13a
scRNA-seq	Sh3bgrl
scRNA-seq	Iqcf4
scRNA-seq	Ocln
scRNA-seq	Kcnc2
scRNA-seq	Gcsh
scRNA-seq	Mplkip
scRNA-seq	Tpt1
scRNA-seq	Polr3gl
scRNA-seq	Trmt112
scRNA-seq	2400006E01Rik
scRNA-seq	Dmrt3
scRNA-seq	Pcbp2
scRNA-seq	Ift57
scRNA-seq	4921507P07Rik
scRNA-seq	Cd109
scRNA-seq	Gtsf1
scRNA-seq	2810474O19Rik
scRNA-seq	Grcc10
scRNA-seq	Mapk10
scRNA-seq	Stat1
scRNA-seq	Knstrn
scRNA-seq	Cd81
scRNA-seq	Caprin2
scRNA-seq	Acadl
scRNA-seq	Tsc22d2
scRNA-seq	Taf4b
scRNA-seq	Arhgef25
scRNA-seq	Upf3b
scRNA-seq	Mtr
scRNA-seq	Plod2
scRNA-seq	Ndufb4
scRNA-seq	Akap4
scRNA-seq	Tnks
scRNA-seq	Smad6
scRNA-seq	Ctsd
scRNA-seq	Strbp
scRNA-seq	Leprotl1
scRNA-seq	Cd93
scRNA-seq	Slc30a9
scRNA-seq	Tpm3
scRNA-seq	Idh3b
scRNA-seq	Calcoco1
scRNA-seq	Btbd7
scRNA-seq	Crygs
scRNA-seq	Foxf1
scRNA-seq	Krit1
scRNA-seq	2310009B15Rik
scRNA-seq	Cox7b2
scRNA-seq	Angel2
scRNA-seq	Bbip1
scRNA-seq	Gpsm3
scRNA-seq	Tars2
scRNA-seq	Ncapg2
scRNA-seq	4833420G17Rik
scRNA-seq	Stx7
scRNA-seq	Abr
scRNA-seq	Fkbp1a
scRNA-seq	Ccdc141
scRNA-seq	Ccsap
scRNA-seq	Pold3
scRNA-seq	Ubap1
scRNA-seq	Itfg2
scRNA-seq	Cbr1
scRNA-seq	Rpl12
scRNA-seq	Lrrc47
scRNA-seq	Dusp7
scRNA-seq	Ccdc112
scRNA-seq	Anxa7
scRNA-seq	1700003P14Rik
scRNA-seq	Cdyl
scRNA-seq	Fubp1
scRNA-seq	Tcf7l1
scRNA-seq	Gm11808
scRNA-seq	Prrx2
scRNA-seq	Zfand1
scRNA-seq	Rpl29
scRNA-seq	Hmgxb4
scRNA-seq	Casc4
scRNA-seq	Mrps14
scRNA-seq	Ccl25
scRNA-seq	Pygl
scRNA-seq	Max
scRNA-seq	Egr2
scRNA-seq	Armc10
scRNA-seq	Utp3
scRNA-seq	Txndc2
scRNA-seq	Wwc2
scRNA-seq	Anapc16
scRNA-seq	Kmt2c
scRNA-seq	Chd7
scRNA-seq	Pnrc1
scRNA-seq	Commd8
scRNA-seq	Ndfip2
scRNA-seq	Gm10399
scRNA-seq	Xrn2
scRNA-seq	1810037I17Rik
scRNA-seq	1500009L16Rik
scRNA-seq	Npepl1
scRNA-seq	Abcd3
scRNA-seq	Cir1
scRNA-seq	Smdt1
scRNA-seq	Sclt1
scRNA-seq	Atp2b1
scRNA-seq	Tescl
scRNA-seq	4930407I10Rik
scRNA-seq	Prdx4
scRNA-seq	Mbd2
scRNA-seq	Frg2f1
scRNA-seq	Raf1
scRNA-seq	Phf20l1
scRNA-seq	Chsy1
scRNA-seq	Igf1r
scRNA-seq	Nlrp4f
scRNA-seq	Ppp1ca
scRNA-seq	Tspan31
scRNA-seq	Hbegf
scRNA-seq	Cetn3
scRNA-seq	Rpa3
scRNA-seq	Sdcbp
scRNA-seq	Zfp950
scRNA-seq	Rpl34
scRNA-seq	Trip12
scRNA-seq	Etfdh
scRNA-seq	Eif5a2
scRNA-seq	Fdxacb1
scRNA-seq	Ip6k1
scRNA-seq	Msh2
scRNA-seq	Ankrd12
scRNA-seq	Ube2d3
scRNA-seq	Gnas
scRNA-seq	Mpc1
scRNA-seq	Hoxc8
scRNA-seq	Cwf19l2
scRNA-seq	Cd9
scRNA-seq	Tacc2
scRNA-seq	Arhgap29
scRNA-seq	Lyst
scRNA-seq	Eif3m
scRNA-seq	1110012L19Rik
scRNA-seq	Rfc3
scRNA-seq	Epb41l4b
scRNA-seq	Hmgn5
scRNA-seq	Rpl37
scRNA-seq	Stk31
scRNA-seq	Tceal9
scRNA-seq	Col13a1
scRNA-seq	Zfp131
scRNA-seq	Rsbn1l
scRNA-seq	Tm2d1
scRNA-seq	Gm26735
scRNA-seq	Mis18a
scRNA-seq	Plxdc2
scRNA-seq	Paip1
scRNA-seq	1700042G07Rik
scRNA-seq	Mtus1
scRNA-seq	Prpf6
scRNA-seq	Rab1a
scRNA-seq	Zfp637
scRNA-seq	Ythdf2
scRNA-seq	Lonp2
scRNA-seq	Pla2g7
scRNA-seq	Nup188
scRNA-seq	Ccnd3
scRNA-seq	Morf4l2
scRNA-seq	Chm
scRNA-seq	Per3
scRNA-seq	Smoc2
scRNA-seq	Smap1
scRNA-seq	Wdr75
scRNA-seq	Tomm5
scRNA-seq	Rbfa
scRNA-seq	Phf13
scRNA-seq	Copb1
scRNA-seq	Urm1
scRNA-seq	Kdm2a
scRNA-seq	Rbm48
scRNA-seq	Cul3
scRNA-seq	Nemf
scRNA-seq	Glg1
scRNA-seq	Mef2d
scRNA-seq	Eml4
scRNA-seq	Akap13
scRNA-seq	Txndc11
scRNA-seq	Dpm1
scRNA-seq	Gstt4
scRNA-seq	Nck1
scRNA-seq	Aig1
scRNA-seq	Plekha5
scRNA-seq	Cenpp
scRNA-seq	Nup98
scRNA-seq	2810408A11Rik
scRNA-seq	Ctnnb1
scRNA-seq	Atf7
scRNA-seq	Tiparp
scRNA-seq	Zfp407
scRNA-seq	Cpeb2
scRNA-seq	Eif3h
scRNA-seq	Bhlhe41
scRNA-seq	Rpgrip1l
scRNA-seq	Rel
scRNA-seq	Phf21a
scRNA-seq	Epc1
scRNA-seq	Atxn10
scRNA-seq	Sf3b1
scRNA-seq	Psmc1
scRNA-seq	Esf1
scRNA-seq	Fth1
scRNA-seq	Zfp330
scRNA-seq	Pip4k2a
scRNA-seq	Gm19395
scRNA-seq	Gas2l3
scRNA-seq	Rhoh
scRNA-seq	Papd5
scRNA-seq	Fam96b
scRNA-seq	Znrf4
scRNA-seq	Fam71f2
scRNA-seq	Bmt2
scRNA-seq	Sh2d3c
scRNA-seq	Stk35
scRNA-seq	Crebzf
scRNA-seq	Limk2
scRNA-seq	Smc4
scRNA-seq	Brd4
scRNA-seq	Rbm26
scRNA-seq	Cabs1
scRNA-seq	Nup133
scRNA-seq	Pgm2l1
scRNA-seq	Ptpn14
scRNA-seq	Lims1
scRNA-seq	Spag1
scRNA-seq	Cyp2u1
scRNA-seq	Tjap1
scRNA-seq	Smc1b
scRNA-seq	Foxn3
scRNA-seq	Acat1
scRNA-seq	Prdm16
scRNA-seq	Pam
scRNA-seq	Mpp5
scRNA-seq	Fut8
scRNA-seq	Coq10b
scRNA-seq	Syne2
scRNA-seq	Jph4
scRNA-seq	Nfu1
scRNA-seq	Bnip3l
scRNA-seq	Arhgef18
scRNA-seq	Dhx36
scRNA-seq	Tbce
scRNA-seq	Phf10
scRNA-seq	Adad1
scRNA-seq	Zfp213
scRNA-seq	Sept1
scRNA-seq	Ccser2
scRNA-seq	Supt5
scRNA-seq	Nfrkb
scRNA-seq	Gpd2
scRNA-seq	Tox4
scRNA-seq	Sh3glb2
scRNA-seq	Dag1
scRNA-seq	Prmt7
scRNA-seq	Txndc8
scRNA-seq	Ndufv3
scRNA-seq	Bnip2
scRNA-seq	Glyr1
scRNA-seq	Tex48
scRNA-seq	Entpd6
scRNA-seq	Med28
scRNA-seq	Cenpq
scRNA-seq	Atg12
scRNA-seq	Zfp462
scRNA-seq	Nmb
scRNA-seq	Epb41l5
scRNA-seq	Neil2
scRNA-seq	Slc25a4
scRNA-seq	Surf4
scRNA-seq	Ubash3b
scRNA-seq	Zfp790
scRNA-seq	Ddx3y
scRNA-seq	Ctnnbip1
scRNA-seq	Pmaip1
scRNA-seq	Eva1b
scRNA-seq	Insig2
scRNA-seq	Pex7
scRNA-seq	Jmjd1c
scRNA-seq	Prkcq
scRNA-seq	1110038F14Rik
scRNA-seq	Ralgapb
scRNA-seq	Cdc26
scRNA-seq	Dnajc13
scRNA-seq	Ep300
scRNA-seq	Ncoa6
scRNA-seq	Bex3
scRNA-seq	Plcb4
scRNA-seq	Pak1
scRNA-seq	Lhx1
scRNA-seq	Ddx42
scRNA-seq	Hdgfl3
scRNA-seq	Brca2
scRNA-seq	Zfand4
scRNA-seq	Dopey1
scRNA-seq	Nexn
scRNA-seq	Tjp2
scRNA-seq	Crbn
scRNA-seq	Ube2q2
scRNA-seq	Phldb1
scRNA-seq	Brwd3
scRNA-seq	Cdc42bpa
scRNA-seq	Usp37
scRNA-seq	Med1
scRNA-seq	Mcm3
scRNA-seq	Ncor2
scRNA-seq	Smyd4
scRNA-seq	Lrriq3
scRNA-seq	Exoc6b
scRNA-seq	Mysm1
scRNA-seq	Eif4e
scRNA-seq	1700029I15Rik
scRNA-seq	Gmpr
scRNA-seq	Pigx
scRNA-seq	Pdcd7
scRNA-seq	Atg5
scRNA-seq	Tcf20
scRNA-seq	Tmx4
scRNA-seq	Tlk2
scRNA-seq	Crnkl1
scRNA-seq	Alkbh1
scRNA-seq	Mob4
scRNA-seq	Acot13
scRNA-seq	Ccdc186
scRNA-seq	Rab18
scRNA-seq	Crebrf
scRNA-seq	Mboat2
scRNA-seq	Trnau1ap
scRNA-seq	Klk8
scRNA-seq	Epb41
scRNA-seq	Zfp958
scRNA-seq	Rap1a
scRNA-seq	Aspm
scRNA-seq	Nol7
scRNA-seq	Erlin2
scRNA-seq	C87436
scRNA-seq	Ccdc114
scRNA-seq	Tle4
scRNA-seq	Rnf130
scRNA-seq	Ryk
scRNA-seq	1700001L19Rik
scRNA-seq	Med24
scRNA-seq	Herc1
scRNA-seq	Usp12
scRNA-seq	Aplp1
scRNA-seq	Tamm41
scRNA-seq	Tcea1
scRNA-seq	Timm17b
scRNA-seq	Arhgap35
scRNA-seq	Commd1
scRNA-seq	Klf13
scRNA-seq	Arhgap17
scRNA-seq	Dtna
scRNA-seq	Stk24
scRNA-seq	Tfdp1
scRNA-seq	Epc2
scRNA-seq	Fosb
scRNA-seq	1700006E09Rik
scRNA-seq	Selenot
scRNA-seq	Fam91a1
scRNA-seq	Rsrp1
scRNA-seq	Tmem33
scRNA-seq	Rrp15
scRNA-seq	Gid4
scRNA-seq	Ccdc18
scRNA-seq	Hhex
scRNA-seq	Ptbp2
scRNA-seq	Mau2
scRNA-seq	A430005L14Rik
scRNA-seq	Nars
scRNA-seq	Usp53
scRNA-seq	Tead1
scRNA-seq	Kpna1
scRNA-seq	Baz2a
scRNA-seq	Cltc
scRNA-seq	Tslrn1
scRNA-seq	Ccdc138
scRNA-seq	Adprh
scRNA-seq	Helb
scRNA-seq	Rnf212
scRNA-seq	Yipf6
scRNA-seq	Dync2h1
scRNA-seq	Ifngr1
scRNA-seq	Map4k3
scRNA-seq	Dusp6
scRNA-seq	Zbtb25
scRNA-seq	Kdelr1
scRNA-seq	Dopey2
scRNA-seq	Esrp1
scRNA-seq	Gipc1
scRNA-seq	Tial1
scRNA-seq	N4bp2l2
scRNA-seq	Depdc7
scRNA-seq	Ctdspl2
scRNA-seq	Hps4
scRNA-seq	Commd7
scRNA-seq	Erp29
scRNA-seq	Actr3
scRNA-seq	Usp44
scRNA-seq	Atp6v1e2
scRNA-seq	Nxf1
scRNA-seq	Gatd1
scRNA-seq	Dph5
scRNA-seq	BC005537
scRNA-seq	Mff
scRNA-seq	Mex3c
scRNA-seq	Zranb2
scRNA-seq	Abhd6
scRNA-seq	Lmna
scRNA-seq	Sptlc2
scRNA-seq	Hars
scRNA-seq	Itpk1
scRNA-seq	Brd8
scRNA-seq	Zfand6
scRNA-seq	Samhd1
scRNA-seq	Zic1
scRNA-seq	Pgap2
scRNA-seq	Serpini1
scRNA-seq	Ckap2l
scRNA-seq	Clcc1
scRNA-seq	Ttc33
scRNA-seq	Bub1b
scRNA-seq	Slfnl1
scRNA-seq	Mastl
scRNA-seq	Cdk13
scRNA-seq	Gtf2h2
scRNA-seq	Ascc3
scRNA-seq	Ppm1a
scRNA-seq	Mtch2
scRNA-seq	Sult5a1
scRNA-seq	Tmem57
scRNA-seq	Apoe
scRNA-seq	Git2
scRNA-seq	Socs3
scRNA-seq	Tmbim1
scRNA-seq	Cenpe
scRNA-seq	Arel1
scRNA-seq	Gskip
scRNA-seq	Cited2
scRNA-seq	Med14
scRNA-seq	Aak1
scRNA-seq	Sdccag3
scRNA-seq	Amn1
scRNA-seq	Zfp90
scRNA-seq	Mpzl2
scRNA-seq	Otub1
scRNA-seq	Trap1a
scRNA-seq	Pdcd6
scRNA-seq	Atf7ip
scRNA-seq	Optn
scRNA-seq	Bcl2l1
scRNA-seq	Ap3d1
scRNA-seq	Cyb5r1
scRNA-seq	Dnaja3
scRNA-seq	AU041133
scRNA-seq	Lcorl
scRNA-seq	Tsc1
scRNA-seq	Mtpap
scRNA-seq	Cisd2
scRNA-seq	Xrn1
scRNA-seq	Mettl1
scRNA-seq	Atg4b
scRNA-seq	Ube2g2
scRNA-seq	Git1
scRNA-seq	Hmgcs1
scRNA-seq	Dnajc1
scRNA-seq	4932438A13Rik
scRNA-seq	Bsdc1
scRNA-seq	Bfar
scRNA-seq	Zfp318
scRNA-seq	1700020I14Rik
scRNA-seq	Gfm2
scRNA-seq	Ctsa
scRNA-seq	Serinc3
scRNA-seq	Cenph
scRNA-seq	Tmem247
scRNA-seq	Atp6v1c1
scRNA-seq	0610009B22Rik
scRNA-seq	Mef2a
scRNA-seq	Mrpl33
scRNA-seq	Meg3
scRNA-seq	Ift122
scRNA-seq	Gnpda2
scRNA-seq	Samm50
scRNA-seq	Wasf1
scRNA-seq	Phc1
scRNA-seq	Cars2
scRNA-seq	Itch
scRNA-seq	Hat1
scRNA-seq	Nras
scRNA-seq	Stk36
scRNA-seq	Ift88
scRNA-seq	Hscb
scRNA-seq	Wdsub1
scRNA-seq	Cd2bp2
scRNA-seq	Mettl14
scRNA-seq	Gltp
scRNA-seq	Pmfbp1
scRNA-seq	Vps13b
scRNA-seq	Mrpl30
scRNA-seq	Marc2
scRNA-seq	Col4a3bp
scRNA-seq	Rab5b
scRNA-seq	Sesn2
scRNA-seq	Ube2h
scRNA-seq	Myl12b
scRNA-seq	Pitrm1
scRNA-seq	Casp9
scRNA-seq	Etv4
scRNA-seq	Btg1
scRNA-seq	Mypop
scRNA-seq	Rbbp8
scRNA-seq	Xlr3c
scRNA-seq	Pcmtd2
scRNA-seq	Plekhb2
scRNA-seq	Epb41l2
scRNA-seq	Rnf149
scRNA-seq	Uba3
scRNA-seq	Napa
scRNA-seq	Pkn2
scRNA-seq	Usp9x
scRNA-seq	Rbm10
scRNA-seq	Arfgap3
scRNA-seq	Orc6
scRNA-seq	Slu7
scRNA-seq	Atox1
scRNA-seq	Smim7
scRNA-seq	Acbd3
scRNA-seq	Cecr2
scRNA-seq	Selenoh
scRNA-seq	Rfk
scRNA-seq	Cpsf7
scRNA-seq	Fam221b
scRNA-seq	Lpp
scRNA-seq	Mfap1a
scRNA-seq	Clstn1
scRNA-seq	Tsg101
scRNA-seq	Tmem80
scRNA-seq	C2cd5
scRNA-seq	Stk4
scRNA-seq	Acads
scRNA-seq	Dennd5b
scRNA-seq	Defb19
scRNA-seq	Cldnd1
scRNA-seq	Bin2
scRNA-seq	Mettl23
scRNA-seq	Senp2
scRNA-seq	Atp6v1e1
scRNA-seq	Cdc42se2
scRNA-seq	Asphd2
scRNA-seq	Zfp667
scRNA-seq	Zdhhc21
scRNA-seq	Rspry1
scRNA-seq	Ptprd
scRNA-seq	Gps1
scRNA-seq	Tmem60
scRNA-seq	Xpc
scRNA-seq	Smad4
scRNA-seq	Tmem29
scRNA-seq	Dcakd
scRNA-seq	Robo1
scRNA-seq	Zfp787
scRNA-seq	Bmp7
scRNA-seq	Las1l
scRNA-seq	Wdr70
scRNA-seq	Camk1d
scRNA-seq	Ubr2
scRNA-seq	Triobp
scRNA-seq	Nucks1
scRNA-seq	March2
scRNA-seq	Ist1
scRNA-seq	Rad18
scRNA-seq	Med7
scRNA-seq	Rad51
scRNA-seq	Anapc1
scRNA-seq	Soat1
scRNA-seq	Enho
scRNA-seq	Junb
scRNA-seq	Mbnl1
scRNA-seq	Kin
scRNA-seq	Wdr89
scRNA-seq	Tle3
scRNA-seq	D10Wsu102e
scRNA-seq	Pclaf
scRNA-seq	Nt5c1b
scRNA-seq	Bet1l
scRNA-seq	Mcl1
scRNA-seq	Letm2
scRNA-seq	Iqub
scRNA-seq	Enkur
scRNA-seq	Tacc1
scRNA-seq	Hsf2bp
scRNA-seq	Nbeal1
scRNA-seq	Zbtb11
scRNA-seq	Negr1
scRNA-seq	Csnk1e
scRNA-seq	Dtwd1
scRNA-seq	Exoc5
scRNA-seq	Asxl3
scRNA-seq	Hmox1
scRNA-seq	3110082I17Rik
scRNA-seq	Dcun1d1
scRNA-seq	Csnk1d
scRNA-seq	Gm773
scRNA-seq	Fam168b
scRNA-seq	Mapk1ip1l
scRNA-seq	Napg
scRNA-seq	Ctnna1
scRNA-seq	Scaf1
scRNA-seq	Prim2
scRNA-seq	Taok3
scRNA-seq	Pdha1
scRNA-seq	Rbpms2
scRNA-seq	Top2b
scRNA-seq	Chchd3
scRNA-seq	Ube3c
scRNA-seq	Golph3l
scRNA-seq	E2f1
scRNA-seq	Vbp1
scRNA-seq	Cfap53
scRNA-seq	Csad
scRNA-seq	Shroom3
scRNA-seq	Itpr3
scRNA-seq	Ldhb
scRNA-seq	Wbscr25
scRNA-seq	Irf2bpl
scRNA-seq	Bambi
scRNA-seq	Pan3
scRNA-seq	Epcam
scRNA-seq	Kdm2b
scRNA-seq	Col22a1
scRNA-seq	Bc1
CUT&Tag	Mrpl15
CUT&Tag	Tcea1
CUT&Tag	Rb1cc1
CUT&Tag	Pcmtd1
CUT&Tag	Rrs1
CUT&Tag	Vcpip1
CUT&Tag	Snhg6
CUT&Tag	Tcf24
CUT&Tag	Cspp1
CUT&Tag	Ncoa2
CUT&Tag	Ube2w
CUT&Tag	Eloc
CUT&Tag	Gdap1
CUT&Tag	Mcm3
CUT&Tag	Efhc1
CUT&Tag	4931408C20Rik
CUT&Tag	Ptp4a1
CUT&Tag	Khdrbs2
CUT&Tag	Dst
CUT&Tag	Imp4
CUT&Tag	Lman2l
CUT&Tag	Cnnm3
CUT&Tag	Actr1b
CUT&Tag	Tmem131
CUT&Tag	Unc50
CUT&Tag	Tsga10
CUT&Tag	Mrpl30
CUT&Tag	Pdcl3
CUT&Tag	Cnot11
CUT&Tag	Rnf149
CUT&Tag	Mrps9
CUT&Tag	Tgfbrap1
CUT&Tag	Uxs1
CUT&Tag	Tpp2
CUT&Tag	Ercc5
CUT&Tag	Wdr75
CUT&Tag	Dnah7b
CUT&Tag	Slc39a10
CUT&Tag	Nabp1
CUT&Tag	Myo1b
CUT&Tag	Stat4
CUT&Tag	Stat1
CUT&Tag	Gls
CUT&Tag	Hibch
CUT&Tag	Pms1
CUT&Tag	Ccdc150
CUT&Tag	Pgap1
CUT&Tag	Sf3b1
CUT&Tag	Coq10b
CUT&Tag	Plcl1
CUT&Tag	Sgo2a
CUT&Tag	Bzw1
CUT&Tag	Orc2
CUT&Tag	Fam126b
CUT&Tag	Stradb
CUT&Tag	Tmem237
CUT&Tag	Als2
CUT&Tag	Fzd7
CUT&Tag	Gm973
CUT&Tag	Sumo1
CUT&Tag	Nop58
CUT&Tag	Fam117b
CUT&Tag	Ica1l
CUT&Tag	Carf
CUT&Tag	Nbeal1
CUT&Tag	Ndufs1
CUT&Tag	Klf7
CUT&Tag	Creb1
CUT&Tag	Ccnyl1
CUT&Tag	Plekhm3
CUT&Tag	Idh1
CUT&Tag	Rpe
CUT&Tag	Spag16
CUT&Tag	Bard1
CUT&Tag	Atic
CUT&Tag	Apol7d
CUT&Tag	D230017M19Rik
CUT&Tag	Pecr
CUT&Tag	Aamp
CUT&Tag	Usp37
CUT&Tag	Bcs1l
CUT&Tag	Ttll4
CUT&Tag	Atg9a
CUT&Tag	Dnpep
CUT&Tag	Tmem198
CUT&Tag	Stk11ip
CUT&Tag	Farsb
CUT&Tag	Acsl3
CUT&Tag	Mrpl44
CUT&Tag	Cul3
CUT&Tag	Agfg1
CUT&Tag	Daw1
CUT&Tag	Sp100
CUT&Tag	Ncl
CUT&Tag	Ptma
CUT&Tag	Pde6d
CUT&Tag	Trpm8
CUT&Tag	Sh3bp4
CUT&Tag	Rbm44
CUT&Tag	Ube2f
CUT&Tag	Scly
CUT&Tag	Per2
CUT&Tag	Asb1
CUT&Tag	Hdac4
CUT&Tag	Ndufa10
CUT&Tag	Capn10
CUT&Tag	Gm28535
CUT&Tag	Pask
CUT&Tag	Hdlbp
CUT&Tag	Farp2
CUT&Tag	Ing5
CUT&Tag	Ppip5k2
CUT&Tag	Slco6d1
CUT&Tag	Relch
CUT&Tag	Zcchc2
CUT&Tag	Gm20753
CUT&Tag	Kdsr
CUT&Tag	Vps4b
CUT&Tag	Dsel
CUT&Tag	2900060B14Rik
CUT&Tag	Tfcp2l1
CUT&Tag	Tmem185b
CUT&Tag	Epb41l5
CUT&Tag	Ptpn4
CUT&Tag	Tmem177
CUT&Tag	Dbi
CUT&Tag	Insig2
CUT&Tag	Ddx18
CUT&Tag	Actr3
CUT&Tag	Slc35f5
CUT&Tag	Mgat5
CUT&Tag	2900009J06Rik
CUT&Tag	Rab3gap1
CUT&Tag	Zranb3
CUT&Tag	Mcm6
CUT&Tag	Dars
CUT&Tag	Pfkfb2
CUT&Tag	Fam72a
CUT&Tag	Mdm4
CUT&Tag	Ppp1r15b
CUT&Tag	Snrpe
CUT&Tag	Cyb5r1
CUT&Tag	Adipor1
CUT&Tag	Rabif
CUT&Tag	Ppp1r12b
CUT&Tag	Ube2t
CUT&Tag	Ddx59
CUT&Tag	Kif14
CUT&Tag	Zfp281
CUT&Tag	2310009B15Rik
CUT&Tag	Aspm
CUT&Tag	Kcnt2
CUT&Tag	Ro60
CUT&Tag	Rgs2
CUT&Tag	Ptgs2
CUT&Tag	Tpr
CUT&Tag	Ivns1abp
CUT&Tag	Swt1
CUT&Tag	2810414N06Rik
CUT&Tag	Rgl1
CUT&Tag	Smg7
CUT&Tag	Lamc1
CUT&Tag	E330020D12Rik
CUT&Tag	Npl
CUT&Tag	Ier5
CUT&Tag	Xpr1
CUT&Tag	Abl2
CUT&Tag	Fam20b
CUT&Tag	Ralgps2
CUT&Tag	Rasal2
CUT&Tag	Cop1
CUT&Tag	Mrps14
CUT&Tag	Cacybp
CUT&Tag	Gas5
CUT&Tag	Dars2
CUT&Tag	Ankrd45
CUT&Tag	Suco
CUT&Tag	Pigc
CUT&Tag	Dnm3
CUT&Tag	Vamp4
CUT&Tag	Gorab
CUT&Tag	Kifap3
CUT&Tag	BC055324
CUT&Tag	Slc19a2
CUT&Tag	Ccdc181
CUT&Tag	Nme7
CUT&Tag	Tiprl
CUT&Tag	Mpc2
CUT&Tag	Mpzl1
CUT&Tag	Pou2f1
CUT&Tag	Tmco1
CUT&Tag	Aldh9a1
CUT&Tag	Pbx1
CUT&Tag	Nuf2
CUT&Tag	Hsd17b7
CUT&Tag	Uap1
CUT&Tag	Mir6546
CUT&Tag	Mpz
CUT&Tag	Klhdc9
CUT&Tag	Copa
CUT&Tag	Pigm
CUT&Tag	Cfap45
CUT&Tag	Fh1
CUT&Tag	Opn3
CUT&Tag	Cep170
CUT&Tag	Adss
CUT&Tag	Catspere2
CUT&Tag	Desi2
CUT&Tag	Cox20
CUT&Tag	Tfb2m
CUT&Tag	Ahctf1
CUT&Tag	Coq8a
CUT&Tag	Lin9
CUT&Tag	Sde2
CUT&Tag	Nvl
CUT&Tag	Trp53bp2
CUT&Tag	Taf1a
CUT&Tag	Dusp10
CUT&Tag	Rab3gap2
CUT&Tag	Eprs
CUT&Tag	Gpatch2
CUT&Tag	Cenpf
CUT&Tag	Rps6kc1
CUT&Tag	Angel2
CUT&Tag	Tmem206
CUT&Tag	Ppp2r5a
CUT&Tag	Dtl
CUT&Tag	Nek2
CUT&Tag	Syt14
CUT&Tag	Utp25
CUT&Tag	A130010J15Rik
CUT&Tag	Cd34
CUT&Tag	Ccdc170
CUT&Tag	Fbxo5
CUT&Tag	Mtrf1l
CUT&Tag	Oprm1
CUT&Tag	Shprh
CUT&Tag	B230208H11Rik
CUT&Tag	Ltv1
CUT&Tag	Nmbr
CUT&Tag	Heca
CUT&Tag	Ccdc28a
CUT&Tag	Tnfaip3
CUT&Tag	Ifngr1
CUT&Tag	Bclaf1
CUT&Tag	Mtfr2
CUT&Tag	Tbpl1
CUT&Tag	Rps12
CUT&Tag	Med23
CUT&Tag	Echdc1
CUT&Tag	Cenpw
CUT&Tag	Hint3
CUT&Tag	Hey2
CUT&Tag	Hddc2
CUT&Tag	Gm15939
CUT&Tag	Rsph4a
CUT&Tag	Rwdd1
CUT&Tag	Dse
CUT&Tag	Tspyl4
CUT&Tag	Nt5dc1
CUT&Tag	Hdac2
CUT&Tag	Fam229b
CUT&Tag	Fyn
CUT&Tag	Slc16a10
CUT&Tag	Rnu3a
CUT&Tag	Amd2
CUT&Tag	Cdk19
CUT&Tag	Cdc40
CUT&Tag	Smpd2
CUT&Tag	Cd164
CUT&Tag	Foxo3
CUT&Tag	Pdss2
CUT&Tag	Crybg1
CUT&Tag	Atg5
CUT&Tag	Gm36173
CUT&Tag	Msl3l2
CUT&Tag	Tbc1d32
CUT&Tag	Serinc1
CUT&Tag	Lims1
CUT&Tag	Ranbp2
CUT&Tag	Ccdc138
CUT&Tag	Mcu
CUT&Tag	Micu1
CUT&Tag	Dnajb12
CUT&Tag	Ddit4
CUT&Tag	Anapc16
CUT&Tag	Psap
CUT&Tag	Eif4ebp2
CUT&Tag	Sar1a
CUT&Tag	Vps26a
CUT&Tag	Kif1bp
CUT&Tag	Ddx21
CUT&Tag	Ddx50
CUT&Tag	Ccar1
CUT&Tag	Hnrnph3
CUT&Tag	Herc4
CUT&Tag	Rtkn2
CUT&Tag	Cdk1
CUT&Tag	Zwint
CUT&Tag	Rab36
CUT&Tag	Specc1l
CUT&Tag	Cabin1
CUT&Tag	Pcnt
CUT&Tag	Lss
CUT&Tag	Pcbp3
CUT&Tag	Gm10941
CUT&Tag	Rrp1
CUT&Tag	2610008E11Rik
CUT&Tag	Bsg
CUT&Tag	Rnf126
CUT&Tag	Fstl3
CUT&Tag	Ptbp1
CUT&Tag	Med16
CUT&Tag	Wdr18
CUT&Tag	Gpx4
CUT&Tag	Stk11
CUT&Tag	Midn
CUT&Tag	Cirbp
CUT&Tag	Pwwp3a
CUT&Tag	Pcsk4
CUT&Tag	Mbd3
CUT&Tag	Abhd17a
CUT&Tag	Csnk1g2
CUT&Tag	Mknk2
CUT&Tag	Mob3a
CUT&Tag	Ap3d1
CUT&Tag	Oaz1
CUT&Tag	Gng7
CUT&Tag	Slc39a3
CUT&Tag	Sgta
CUT&Tag	Thop1
CUT&Tag	Map2k2
CUT&Tag	Zbtb7a
CUT&Tag	Pias4
CUT&Tag	Dapk3
CUT&Tag	Pip5k1c
CUT&Tag	Cactin
CUT&Tag	Fzr1
CUT&Tag	Dohh
CUT&Tag	Tle6
CUT&Tag	Gm10778
CUT&Tag	Zfp873
CUT&Tag	AU041133
CUT&Tag	Zfp938
CUT&Tag	Tcp11l2
CUT&Tag	Polr3b
CUT&Tag	Ric8b
CUT&Tag	Mterf2
CUT&Tag	Cry1
CUT&Tag	Pwp1
CUT&Tag	Prdm4
CUT&Tag	Ttc41
CUT&Tag	Nt5dc3
CUT&Tag	Sycp3
CUT&Tag	Gas2l3
CUT&Tag	Apaf1
CUT&Tag	Slc25a3
CUT&Tag	Tmpo
CUT&Tag	Nedd1
CUT&Tag	Lta4h
CUT&Tag	Fgd6
CUT&Tag	Eea1
CUT&Tag	Btg1
CUT&Tag	Ccer1
CUT&Tag	4930525C09Rik
CUT&Tag	Dusp6
CUT&Tag	Cep290
CUT&Tag	Gm5136
CUT&Tag	E2f7
CUT&Tag	Osbpl8
CUT&Tag	Bbs10
CUT&Tag	Nap1l1
CUT&Tag	Krr1
CUT&Tag	Kcnc2
CUT&Tag	Tbc1d15
CUT&Tag	Zfc3h1
CUT&Tag	Yeats4
CUT&Tag	Nup107
CUT&Tag	Mdm1
CUT&Tag	Cand1
CUT&Tag	Helb
CUT&Tag	Llph
CUT&Tag	Wif1
CUT&Tag	4930432O09Rik
CUT&Tag	Gns
CUT&Tag	Rassf3
CUT&Tag	Xpot
CUT&Tag	Rxylt1
CUT&Tag	Mon2
CUT&Tag	Cdk4
CUT&Tag	Os9
CUT&Tag	Ddit3
CUT&Tag	Nemp1
CUT&Tag	Naca
CUT&Tag	Atp5b
CUT&Tag	Stat2
CUT&Tag	Cs
CUT&Tag	Rnf41
CUT&Tag	Zc3h10
CUT&Tag	Pa2g4
CUT&Tag	Rps26
CUT&Tag	Rab5b
CUT&Tag	Sarnp
CUT&Tag	9030616G12Rik
CUT&Tag	Neurod4
CUT&Tag	Drg1
CUT&Tag	Limk2
CUT&Tag	Tug1
CUT&Tag	4921536K21Rik
CUT&Tag	Ccdc157
CUT&Tag	Tbc1d10a
CUT&Tag	Hormad2
CUT&Tag	Nf2
CUT&Tag	Ap1b1
CUT&Tag	Ewsr1
CUT&Tag	Znrf3
CUT&Tag	Ccdc117
CUT&Tag	Urgcp
CUT&Tag	Ykt6
CUT&Tag	Ddx56
CUT&Tag	Tmed4
CUT&Tag	Ogdh
CUT&Tag	H2afv
CUT&Tag	Snhg15
CUT&Tag	Ccm2
CUT&Tag	Hus1
CUT&Tag	Gm11992
CUT&Tag	Zpbp
CUT&Tag	Ikzf1
CUT&Tag	Fignl1
CUT&Tag	Grb10
CUT&Tag	Fbxo48
CUT&Tag	Wdr92
CUT&Tag	Etaa1os
CUT&Tag	Actr2
CUT&Tag	Rab1a
CUT&Tag	Sertad2
CUT&Tag	Aftph
CUT&Tag	Peli1
CUT&Tag	Ugp2
CUT&Tag	Mdh1
CUT&Tag	Ehbp1
CUT&Tag	Cct4
CUT&Tag	Xpo1
CUT&Tag	0610010F05Rik
CUT&Tag	Pex13
CUT&Tag	Rel
CUT&Tag	Papolg
CUT&Tag	Fancl
CUT&Tag	Ppp4r3b
CUT&Tag	Cfap36
CUT&Tag	Clhc1
CUT&Tag	Rtn4
CUT&Tag	4930505A04Rik
CUT&Tag	Asb3
CUT&Tag	Chac2
CUT&Tag	Cpeb4
CUT&Tag	Snrnp25
CUT&Tag	Ubtd2
CUT&Tag	Npm1
CUT&Tag	Spdl1
CUT&Tag	Pank3
CUT&Tag	Hmmr
CUT&Tag	Ccng1
CUT&Tag	Pwwp2a
CUT&Tag	Ublcp1
CUT&Tag	Thg1l
CUT&Tag	Sox30
CUT&Tag	Med7
CUT&Tag	Trim41
CUT&Tag	Mgat1
CUT&Tag	Mapk9
CUT&Tag	Rasgef1c
CUT&Tag	Mrnip
CUT&Tag	Maml1
CUT&Tag	Canx
CUT&Tag	Hnrnph1
CUT&Tag	Clk4
CUT&Tag	Nhp2
CUT&Tag	0610009B22Rik
CUT&Tag	Ube2b
CUT&Tag	Ppp2ca
CUT&Tag	Skp1a
CUT&Tag	Gdf9
CUT&Tag	Kif3a
CUT&Tag	Rad50
CUT&Tag	Slc22a5
CUT&Tag	Slc22a21
CUT&Tag	Rapgef6
CUT&Tag	Cdc42se2
CUT&Tag	Lyrm7
CUT&Tag	Gm2a
CUT&Tag	G3bp1
CUT&Tag	Mfap3
CUT&Tag	Cnot8
CUT&Tag	Zfp672
CUT&Tag	Lypd9
CUT&Tag	Hist3h2ba
CUT&Tag	Iba57
CUT&Tag	Arf1
CUT&Tag	Nt5m
CUT&Tag	Pemt
CUT&Tag	Tom1l2
CUT&Tag	Atpaf2
CUT&Tag	Shmt1
CUT&Tag	Tmem11
CUT&Tag	Usp22
CUT&Tag	Aldh3a2
CUT&Tag	Mapk7
CUT&Tag	Prpsap2
CUT&Tag	Specc1
CUT&Tag	Adora2b
CUT&Tag	Ubb
CUT&Tag	Snord49b
CUT&Tag	Zfp287
CUT&Tag	Zfp286
CUT&Tag	Tvp23b
CUT&Tag	Elac2
CUT&Tag	Map2k4
CUT&Tag	Gm12296
CUT&Tag	Mfsd6l
CUT&Tag	Myh10
CUT&Tag	Ndel1
CUT&Tag	Slc25a35
CUT&Tag	Fxr2
CUT&Tag	Eif4a1
CUT&Tag	Polr2a
CUT&Tag	Chrnb1
CUT&Tag	Tmem256
CUT&Tag	Neurl4
CUT&Tag	Eif5a
CUT&Tag	Elp5
CUT&Tag	Dlg4
CUT&Tag	Slc16a13
CUT&Tag	Arrb2
CUT&Tag	Psmb6
CUT&Tag	Mink1
CUT&Tag	Spag7
CUT&Tag	Inca1
CUT&Tag	Derl2
CUT&Tag	Med31
CUT&Tag	Tekt1
CUT&Tag	Ankfy1
CUT&Tag	Emc6
CUT&Tag	Shpk
CUT&Tag	Pafah1b1
CUT&Tag	Mettl16
CUT&Tag	Smyd4
CUT&Tag	Mir22hg
CUT&Tag	Prpf8
CUT&Tag	Rilp
CUT&Tag	Slc43a2
CUT&Tag	Inpp5k
CUT&Tag	Dbil5
CUT&Tag	Timm22
CUT&Tag	Gosr1
CUT&Tag	Nsrp1
CUT&Tag	Ssh2
CUT&Tag	Taok1
CUT&Tag	Nufip2
CUT&Tag	Phf12
CUT&Tag	Eral1
CUT&Tag	Fam222b
CUT&Tag	Aldoc
CUT&Tag	Tnfaip1
CUT&Tag	Tmem97
CUT&Tag	Wsb1
CUT&Tag	Utp6
CUT&Tag	Suz12
CUT&Tag	Myo1d
CUT&Tag	Cct6b
CUT&Tag	AA465934
CUT&Tag	Taf15
CUT&Tag	Ddx52
CUT&Tag	Usp32
CUT&Tag	Ppm1d
CUT&Tag	Bcas3
CUT&Tag	Brip1
CUT&Tag	Rnft1
CUT&Tag	Tubd1
CUT&Tag	Cltc
CUT&Tag	Dhx40
CUT&Tag	Ppm1e
CUT&Tag	Rad51c
CUT&Tag	Mtmr4
CUT&Tag	Srsf1
CUT&Tag	Dgke
CUT&Tag	Mmd
CUT&Tag	Stxbp4
CUT&Tag	Kif2b
CUT&Tag	Mbtd1
CUT&Tag	Nme1
CUT&Tag	Gm11520
CUT&Tag	Fam117a
CUT&Tag	4833417C18Rik
CUT&Tag	Atp5g1
CUT&Tag	Snx11
CUT&Tag	Nfe2l1
CUT&Tag	D030028A08Rik
CUT&Tag	Sp2
CUT&Tag	Osbpl7
CUT&Tag	Kpnb1
CUT&Tag	Mrpl45
CUT&Tag	Psmb3
CUT&Tag	Mir8102
CUT&Tag	Cwc25
CUT&Tag	Rpl23
CUT&Tag	Fbxo47
CUT&Tag	Cdk12
CUT&Tag	Zpbp2
CUT&Tag	Psmd3
CUT&Tag	Casc3
CUT&Tag	Cdc6
CUT&Tag	Top2a
CUT&Tag	Eif1
CUT&Tag	Jup
CUT&Tag	Acly
CUT&Tag	Rab5c
CUT&Tag	Stat3
CUT&Tag	Atp6v0a1
CUT&Tag	Becn1
CUT&Tag	Rpl27
CUT&Tag	Brca1
CUT&Tag	Rdm1
CUT&Tag	Dhx8
CUT&Tag	Cd300lg
CUT&Tag	Meioc
CUT&Tag	Nmt1
CUT&Tag	Hexim2
CUT&Tag	Map3k14
CUT&Tag	Plekhm1
CUT&Tag	C130046K22Rik
CUT&Tag	Arf2
CUT&Tag	Kansl1
CUT&Tag	Myl4
CUT&Tag	Efcab3
CUT&Tag	March10
CUT&Tag	Dcaf7
CUT&Tag	Map3k3
CUT&Tag	Strada
CUT&Tag	Ccdc47
CUT&Tag	Psmc5
CUT&Tag	Smarcd2
CUT&Tag	Ern1
CUT&Tag	Snord104
CUT&Tag	Polg2
CUT&Tag	Ddx5
CUT&Tag	Psmd12
CUT&Tag	Cep112
CUT&Tag	Amz2
CUT&Tag	Wipi1
CUT&Tag	Kcnj2
CUT&Tag	D11Wsu47e
CUT&Tag	Slc9a3r1
CUT&Tag	Fdxr
CUT&Tag	Jpt1
CUT&Tag	Nup85
CUT&Tag	Slc25a19
CUT&Tag	Recql5
CUT&Tag	H3f3b
CUT&Tag	Unk
CUT&Tag	Wbp2
CUT&Tag	Fbf1
CUT&Tag	Ubald2
CUT&Tag	Jmjd6
CUT&Tag	Srsf2
CUT&Tag	Sec14l1
CUT&Tag	Tnrc6c
CUT&Tag	Cyth1
CUT&Tag	Usp36
CUT&Tag	Ccdc40
CUT&Tag	Eif4a3
CUT&Tag	Endov
CUT&Tag	Rptoros
CUT&Tag	Ndufaf8
CUT&Tag	Slc38a10
CUT&Tag	Hgs
CUT&Tag	P4hb
CUT&Tag	Cenpx
CUT&Tag	Fasn
CUT&Tag	Ccdc57
CUT&Tag	Hexdc
CUT&Tag	Narf
CUT&Tag	Rab40b
CUT&Tag	Fn3krp
CUT&Tag	Zfp750
CUT&Tag	B3gntl1
CUT&Tag	Rab10
CUT&Tag	Efr3b
CUT&Tag	Dnajc27
CUT&Tag	Cenpo
CUT&Tag	Fam228b
CUT&Tag	Sf3b6
CUT&Tag	Atad2b
CUT&Tag	Ldah
CUT&Tag	Laptm4a
CUT&Tag	Wdr35
CUT&Tag	Gen1
CUT&Tag	Rad51ap2
CUT&Tag	4930448C13Rik
CUT&Tag	Itgb1bp1
CUT&Tag	Adam17
CUT&Tag	Ywhaq
CUT&Tag	Klf11
CUT&Tag	Mboat2
CUT&Tag	Trappc12
CUT&Tag	Myt1l
CUT&Tag	Sntg2
CUT&Tag	Acp1
CUT&Tag	Dld
CUT&Tag	Cog5
CUT&Tag	Hbp1
CUT&Tag	Nampt
CUT&Tag	Efcab10
CUT&Tag	Etv1
CUT&Tag	Arl4a
CUT&Tag	Ifrd1
CUT&Tag	Dock4
CUT&Tag	Mir5627
CUT&Tag	Pnpla8
CUT&Tag	Nova1
CUT&Tag	G2e3
CUT&Tag	Scfd1
CUT&Tag	Strn3
CUT&Tag	Dtd2
CUT&Tag	Arhgap5
CUT&Tag	Eapp
CUT&Tag	Srp54a
CUT&Tag	Brms1l
CUT&Tag	Mbip
CUT&Tag	Ttc6
CUT&Tag	Sec23a
CUT&Tag	Pnn
CUT&Tag	Fbxo33
CUT&Tag	Togaram1
CUT&Tag	Fkbp3
CUT&Tag	Mis18bp1
CUT&Tag	Rpl10l
CUT&Tag	Rps29
CUT&Tag	Lrr1
CUT&Tag	Mgat2
CUT&Tag	Atl1
CUT&Tag	Tmx1
CUT&Tag	Actr10
CUT&Tag	Psma3
CUT&Tag	Arid4a
CUT&Tag	Daam1
CUT&Tag	Gpr135
CUT&Tag	Jkamp
CUT&Tag	Lrrc9
CUT&Tag	Pcnx4
CUT&Tag	4930447C04Rik
CUT&Tag	Slc38a6
CUT&Tag	Hif1a
CUT&Tag	Snapc1
CUT&Tag	Ppp2r5e
CUT&Tag	Wdr89
CUT&Tag	Hspa2
CUT&Tag	Fntb
CUT&Tag	Max
CUT&Tag	Fut8
CUT&Tag	Gphn
CUT&Tag	Mpp5
CUT&Tag	Eif2s1
CUT&Tag	Vti1b
CUT&Tag	Zfyve26
CUT&Tag	Exd2
CUT&Tag	Erh
CUT&Tag	Susd6
CUT&Tag	Cox16
CUT&Tag	Med6
CUT&Tag	Map3k9
CUT&Tag	Dpf3
CUT&Tag	Dcaf4
CUT&Tag	Zfyve1
CUT&Tag	Rbm25
CUT&Tag	Numb
CUT&Tag	Dnal1
CUT&Tag	Ptgr2
CUT&Tag	Zfp410
CUT&Tag	Fam161b
CUT&Tag	Aldh6a1
CUT&Tag	Npc2
CUT&Tag	Eif2b2
CUT&Tag	Ttll5
CUT&Tag	Angel1
CUT&Tag	Cipc
CUT&Tag	Vipas39
CUT&Tag	Sptlc2
CUT&Tag	Alkbh1
CUT&Tag	Snw1
CUT&Tag	Tshr
CUT&Tag	Sel1l
CUT&Tag	Spata7
CUT&Tag	Ttc8
CUT&Tag	4930474N09Rik
CUT&Tag	Efcab11
CUT&Tag	Nrde2
CUT&Tag	Gm10433
CUT&Tag	Rps6ka5
CUT&Tag	Tc2n
CUT&Tag	Atxn3
CUT&Tag	Cpsf2
CUT&Tag	Lgmn
CUT&Tag	Golga5
CUT&Tag	Ddx24
CUT&Tag	Snhg10
CUT&Tag	Ak7
CUT&Tag	Vrk1
CUT&Tag	Ccnk
CUT&Tag	Cyp46a1
CUT&Tag	Evl
CUT&Tag	Slc25a47
CUT&Tag	Wdr25
CUT&Tag	Ppp2r5c
CUT&Tag	B930059L03Rik
CUT&Tag	Wdr20
CUT&Tag	Rcor1
CUT&Tag	Eif5
CUT&Tag	2810029C07Rik
CUT&Tag	Zfyve21
CUT&Tag	Siva1
CUT&Tag	Brf1
CUT&Tag	Tedc1
CUT&Tag	Zfp386
CUT&Tag	Esyt2
CUT&Tag	D430020J02Rik
CUT&Tag	Sp4
CUT&Tag	Gdi2
CUT&Tag	Tasor2
CUT&Tag	Tubal3
CUT&Tag	Akr1e1
CUT&Tag	Klf6
CUT&Tag	Pitrm1
CUT&Tag	Pfkp
CUT&Tag	Wdr37
CUT&Tag	Idi1
CUT&Tag	Gtpbp4
CUT&Tag	Larp4b
CUT&Tag	Mtr
CUT&Tag	Actn2
CUT&Tag	Heatr1
CUT&Tag	Ero1lb
CUT&Tag	Lyst
CUT&Tag	B3galnt2
CUT&Tag	Ggps1
CUT&Tag	Psma2
CUT&Tag	AW209491
CUT&Tag	Mplkip
CUT&Tag	Cdk13
CUT&Tag	Stard3nl
CUT&Tag	Elmo1
CUT&Tag	Zkscan3
CUT&Tag	Nkapl
CUT&Tag	Zfp389
CUT&Tag	Hist1h2bm
CUT&Tag	Hist1h2ak
CUT&Tag	Hist1h2an
CUT&Tag	Hist1h4n
CUT&Tag	Zfp184
CUT&Tag	Hist1h2ag
CUT&Tag	Zfp322a
CUT&Tag	Hist1h3g
CUT&Tag	Hist1h3f
CUT&Tag	Hist1h2ad
CUT&Tag	Hist1h2ac
CUT&Tag	Hist1h4c
CUT&Tag	Hist1h1c
CUT&Tag	Hist1h2aa
CUT&Tag	Gmnn
CUT&Tag	BC005537
CUT&Tag	Hdgfl1
CUT&Tag	E2f3
CUT&Tag	Rpp40
CUT&Tag	Lyrm4
CUT&Tag	Rreb1
CUT&Tag	Cage1
CUT&Tag	Snrnp48
CUT&Tag	A730081D07Rik
CUT&Tag	Smim13
CUT&Tag	Nedd9
CUT&Tag	Tmem170b
CUT&Tag	Hivep1
CUT&Tag	Nol7
CUT&Tag	Kdm1b
CUT&Tag	Cenpp
CUT&Tag	Iars
CUT&Tag	Spin1
CUT&Tag	Cks2
CUT&Tag	Secisbp2
CUT&Tag	Auh
CUT&Tag	Cplx2
CUT&Tag	Nop16
CUT&Tag	Rnf44
CUT&Tag	Tspan17
CUT&Tag	Lman2
CUT&Tag	Grk6
CUT&Tag	Tmed9
CUT&Tag	Fbxl21
CUT&Tag	Hnrnpa0
CUT&Tag	Hnrnpk
CUT&Tag	A230056J06Rik
CUT&Tag	Etohd2
CUT&Tag	Zfp935
CUT&Tag	Mir713
CUT&Tag	Gm5141
CUT&Tag	Fancc
CUT&Tag	Ercc6l2
CUT&Tag	Zfp367
CUT&Tag	Habp4
CUT&Tag	Cdc14b
CUT&Tag	Prxl2c
CUT&Tag	Ctsl
CUT&Tag	Cdk20
CUT&Tag	Mfsd14b
CUT&Tag	Ptdss1
CUT&Tag	Zfp708
CUT&Tag	Zfp759
CUT&Tag	Rsl1
CUT&Tag	F630042J09Rik
CUT&Tag	Zfp874b
CUT&Tag	Zfp58
CUT&Tag	Zfp87
CUT&Tag	Zfp748
CUT&Tag	Zfp729b
CUT&Tag	Zfp65
CUT&Tag	Zfp85
CUT&Tag	Mtrr
CUT&Tag	Nsun2
CUT&Tag	Ice1
CUT&Tag	Lpcat1
CUT&Tag	Brd9
CUT&Tag	Cep72
CUT&Tag	Pdcd6
CUT&Tag	Sdha
CUT&Tag	Ell2
CUT&Tag	Rfesd
CUT&Tag	Slf1
CUT&Tag	Pou5f2
CUT&Tag	Arrdc3
CUT&Tag	Adgrv1
CUT&Tag	Polr3g
CUT&Tag	Cetn3
CUT&Tag	A230107N01Rik
CUT&Tag	Rasa1
CUT&Tag	Cox7c
CUT&Tag	Xrcc4
CUT&Tag	Rps23
CUT&Tag	Ssbp2
CUT&Tag	Zcchc9
CUT&Tag	Dhfr
CUT&Tag	Fam151b
CUT&Tag	Zfyve16
CUT&Tag	Serinc5
CUT&Tag	Tent2
CUT&Tag	Homer1
CUT&Tag	Lhfpl2
CUT&Tag	Poc5
CUT&Tag	Polk
CUT&Tag	Hmgcr
CUT&Tag	Gfm2
CUT&Tag	Utp15
CUT&Tag	Fcho2
CUT&Tag	Mrps27
CUT&Tag	Mccc2
CUT&Tag	Smn1
CUT&Tag	Ak6
CUT&Tag	Cdk7
CUT&Tag	Mrps36
CUT&Tag	Ccnb1
CUT&Tag	Slc30a5
CUT&Tag	Ppwd1
CUT&Tag	4933425L06Rik
CUT&Tag	Ipo11
CUT&Tag	Zswim6
CUT&Tag	Ercc8
CUT&Tag	Plk2
CUT&Tag	Gpbp1
CUT&Tag	Mier3
CUT&Tag	Slc38a9
CUT&Tag	Dhx29
CUT&Tag	Mocs2
CUT&Tag	Hmgcs1
CUT&Tag	Zfp131
CUT&Tag	Rpp14
CUT&Tag	Pdhb
CUT&Tag	4930455B14Rik
CUT&Tag	3830406C13Rik
CUT&Tag	Slc4a7
CUT&Tag	Top2b
CUT&Tag	Nr1d2
CUT&Tag	Rpl15
CUT&Tag	Saysd1
CUT&Tag	Fam149b
CUT&Tag	Sec24c
CUT&Tag	Vcl
CUT&Tag	Adk
CUT&Tag	Kat6b
CUT&Tag	Vdac2
CUT&Tag	Arf4
CUT&Tag	Appl1
CUT&Tag	Arhgef3
CUT&Tag	Tasor
CUT&Tag	Ccdc66
CUT&Tag	Selenok
CUT&Tag	Actr8
CUT&Tag	Dcp1a
CUT&Tag	Stimate
CUT&Tag	Nek4
CUT&Tag	Spcs1
CUT&Tag	Gnl3
CUT&Tag	Smim4
CUT&Tag	Capn7
CUT&Tag	Mettl6
CUT&Tag	Btd
CUT&Tag	Dph3
CUT&Tag	Ncoa4
CUT&Tag	Ercc6
CUT&Tag	Ptpn20
CUT&Tag	Wapl
CUT&Tag	Ccser2
CUT&Tag	Ghitm
CUT&Tag	Tspan14
CUT&Tag	Txndc16
CUT&Tag	Psmc6
CUT&Tag	Cdkn3
CUT&Tag	Gmfb
CUT&Tag	Cgrrf1
CUT&Tag	Wdhd1
CUT&Tag	Tmem260
CUT&Tag	Exoc5
CUT&Tag	Naa30
CUT&Tag	Slc35f4
CUT&Tag	Armh4
CUT&Tag	Parp2
CUT&Tag	Apex1
CUT&Tag	Pnp
CUT&Tag	Hnrnpc
CUT&Tag	Chd8
CUT&Tag	Tox4
CUT&Tag	Mettl3
CUT&Tag	Abhd4
CUT&Tag	Prmt5
CUT&Tag	Haus4
CUT&Tag	Acin1
CUT&Tag	Pabpn1
CUT&Tag	Ngdn
CUT&Tag	Dcaf11
CUT&Tag	Psme2
CUT&Tag	Rec8
CUT&Tag	Gmpr2
CUT&Tag	Rnf17
CUT&Tag	Mphosph8
CUT&Tag	Pspc1
CUT&Tag	Cryl1
CUT&Tag	1700039M10Rik
CUT&Tag	Xpo4
CUT&Tag	Setdb2
CUT&Tag	Nupl1
CUT&Tag	Mtmr6
CUT&Tag	Spata13
CUT&Tag	Sacs
CUT&Tag	Ebpl
CUT&Tag	Spryd7
CUT&Tag	Dleu2
CUT&Tag	Ints6
CUT&Tag	Wdfy2
[truncated: 2,868 more rows]

## Sheet: B
ID	Description	GeneRatio	BgRatio	pvalue	p.adjust	qvalue
GO:0006281	DNA repair	179/3369	464/23174	5.88e-38	3.44e-34	2.68e-34
GO:0034660	ncRNA metabolic process	155/3369	458/23174	9.5e-26	1.76e-22	1.37e-22
GO:0006417	regulation of translation	115/3369	329/23174	1.09e-20	4.89e-18	3.81e-18
GO:0007346	regulation of mitotic cell cycle	150/3369	492/23174	5.8e-20	2.26e-17	1.76e-17
GO:0007051	spindle organization	68/3369	165/23174	5.76e-17	1.6e-14	1.25e-14
GO:0032259	methylation	106/3369	335/23174	1.05e-15	1.98e-13	1.54e-13
GO:0140014	mitotic nuclear division	87/3369	256/23174	3.7e-15	6.36e-13	4.96e-13
GO:0048193	Golgi vesicle transport	86/3369	260/23174	3.14e-14	4.7e-12	3.66e-12
GO:0033044	regulation of chromosome organization	106/3369	354/23174	6.29e-14	8.54e-12	6.65e-12
GO:0051783	regulation of nuclear division	69/3369	194/23174	2.14e-13	2.55e-11	1.98e-11
GO:0006913	nucleocytoplasmic transport	90/3369	287/23174	2.69e-13	2.96e-11	2.31e-11
GO:0051169	nuclear transport	90/3369	287/23174	2.69e-13	2.96e-11	2.31e-11
GO:0071824	protein-DNA complex subunit organization	73/3369	214/23174	4.82e-13	4.89e-11	3.81e-11
GO:0009314	response to radiation	111/3369	394/23174	1.37e-12	1.34e-10	1.04e-10
GO:0090407	organophosphate biosynthetic process	132/3369	498/23174	1.42e-12	1.36e-10	1.06e-10
GO:0051656	establishment of organelle localization	127/3369	474/23174	1.68e-12	1.51e-10	1.18e-10
GO:1903320	regulation of protein modification by small protein conjugation or removal	75/3369	229/23174	2.36e-12	2.03e-10	1.58e-10
GO:0031503	protein-containing complex localization	79/3369	247/23174	2.46e-12	2.08e-10	1.62e-10
GO:0072594	establishment of protein localization to organelle	106/3369	374/23174	2.92e-12	2.44e-10	1.9e-10
GO:0016569	covalent chromatin modification	120/3369	443/23174	3.14e-12	2.55e-10	1.98e-10
GO:0032886	regulation of microtubule-based process	75/3369	232/23174	4.87e-12	3.9e-10	3.04e-10
GO:0065004	protein-DNA complex assembly	61/3369	172/23174	5.96e-12	4.71e-10	3.67e-10
GO:0006732	coenzyme metabolic process	95/3369	326/23174	7.03e-12	5.48e-10	4.27e-10
GO:0000077	DNA damage checkpoint	43/3369	101/23174	7.97e-12	5.97e-10	4.65e-10
GO:0016570	histone modification	114/3369	426/23174	2.51e-11	1.79e-09	1.39e-09
GO:0061982	meiosis I cell cycle process	45/3369	112/23174	2.87e-11	2.02e-09	1.57e-09
GO:0006914	autophagy	105/3369	383/23174	3.29e-11	2.26e-09	1.76e-09
GO:0061919	process utilizing autophagic mechanism	105/3369	383/23174	3.29e-11	2.26e-09	1.76e-09
GO:0006611	protein export from nucleus	46/3369	119/23174	8.31e-11	5.4e-09	4.21e-09
GO:0022618	ribonucleoprotein complex assembly	70/3369	222/23174	8.79e-11	5.65e-09	4.4e-09
GO:0010256	endomembrane system organization	103/3369	381/23174	1.21e-10	7.71e-09	6.01e-09
GO:2001020	regulation of response to DNA damage stimulus	66/3369	209/23174	2.79e-10	1.63e-08	1.27e-08
GO:0006457	protein folding	53/3369	152/23174	2.91e-10	1.68e-08	1.31e-08
GO:0097193	intrinsic apoptotic signaling pathway	83/3369	292/23174	5.62e-10	2.96e-08	2.3e-08
GO:0051983	regulation of chromosome segregation	40/3369	102/23174	8.38e-10	4.3e-08	3.35e-08
GO:0050000	chromosome localization	33/3369	76/23174	1.13e-09	5.73e-08	4.47e-08
GO:1905818	regulation of chromosome separation	29/3369	62/23174	1.36e-09	6.73e-08	5.24e-08
GO:0099111	microtubule-based transport	53/3369	159/23174	1.85e-09	8.91e-08	6.94e-08
GO:0006403	RNA localization	55/3369	169/23174	2.47e-09	1.15e-07	8.93e-08
GO:1903829	positive regulation of cellular protein localization	81/3369	297/23174	7.32e-09	3.17e-07	2.47e-07
GO:0006413	translational initiation	39/3369	105/23174	8.35e-09	3.56e-07	2.78e-07
GO:1905515	non-motile cilium assembly	29/3369	67/23174	1.24e-08	5.14e-07	4e-07
GO:0016579	protein deubiquitination	41/3369	115/23174	1.39e-08	5.73e-07	4.47e-07
GO:0044270	cellular nitrogen compound catabolic process	111/3369	456/23174	1.62e-08	6.62e-07	5.15e-07
GO:0046700	heterocycle catabolic process	112/3369	462/23174	1.77e-08	7.1e-07	5.53e-07
GO:0006163	purine nucleotide metabolic process	108/3369	441/23174	1.79e-08	7.12e-07	5.54e-07
GO:0072521	purine-containing compound metabolic process	116/3369	484/23174	1.96e-08	7.67e-07	5.98e-07
GO:0031647	regulation of protein stability	75/3369	275/23174	2.6e-08	9.79e-07	7.63e-07
GO:0050657	nucleic acid transport	47/3369	145/23174	3.99e-08	1.43e-06	1.12e-06
GO:0050658	RNA transport	47/3369	145/23174	3.99e-08	1.43e-06	1.12e-06
GO:0006101	citrate metabolic process	18/3369	32/23174	4.87e-08	1.73e-06	1.34e-06
GO:0010506	regulation of autophagy	68/3369	247/23174	7.69e-08	2.6e-06	2.02e-06
GO:0040029	regulation of gene expression, epigenetic	75/3369	282/23174	8.06e-08	2.71e-06	2.11e-06
GO:0019439	aromatic compound catabolic process	112/3369	476/23174	9.62e-08	3.14e-06	2.45e-06
GO:0071103	DNA conformation change	60/3369	210/23174	1.07e-07	3.47e-06	2.7e-06
GO:0071478	cellular response to radiation	48/3369	154/23174	1.12e-07	3.59e-06	2.8e-06
GO:0016311	dephosphorylation	90/3369	361/23174	1.14e-07	3.62e-06	2.82e-06
GO:0006900	vesicle budding from membrane	24/3369	55/23174	1.83e-07	5.62e-06	4.38e-06
GO:0010257	NADH dehydrogenase complex assembly	21/3369	45/23174	2.66e-07	7.92e-06	6.17e-06
GO:0032981	mitochondrial respiratory chain complex I assembly	21/3369	45/23174	2.66e-07	7.92e-06	6.17e-06
GO:1902115	regulation of organelle assembly	58/3369	206/23174	2.98e-07	8.74e-06	6.81e-06
GO:0062012	regulation of small molecule metabolic process	87/3369	353/23174	3.15e-07	9.15e-06	7.13e-06
GO:0006979	response to oxidative stress	96/3369	401/23174	3.36e-07	9.58e-06	7.47e-06
GO:0045333	cellular respiration	48/3369	160/23174	4.04e-07	1.12e-05	8.75e-06
GO:1901998	toxin transport	19/3369	39/23174	4.25e-07	1.16e-05	9.07e-06
GO:0071166	ribonucleoprotein complex localization	26/3369	65/23174	4.63e-07	1.26e-05	9.84e-06
GO:0007623	circadian rhythm	58/3369	209/23174	5.05e-07	1.34e-05	1.04e-05
GO:0032386	regulation of intracellular transport	102/3369	437/23174	5.29e-07	1.39e-05	1.09e-05
GO:0007131	reciprocal meiotic recombination	20/3369	44/23174	8.65e-07	2.23e-05	1.73e-05
GO:0032465	regulation of cytokinesis	29/3369	79/23174	8.75e-07	2.24e-05	1.75e-05
GO:0035966	response to topologically incorrect protein	40/3369	127/23174	9.19e-07	2.33e-05	1.82e-05
GO:0051653	spindle localization	21/3369	48/23174	1.01e-06	2.55e-05	1.99e-05
GO:0048194	Golgi vesicle budding	17/3369	34/23174	1.08e-06	2.72e-05	2.12e-05
GO:0016126	sterol biosynthetic process	22/3369	52/23174	1.13e-06	2.8e-05	2.18e-05
GO:0035967	cellular response to topologically incorrect protein	33/3369	97/23174	1.19e-06	2.94e-05	2.29e-05
GO:0009896	positive regulation of catabolic process	97/3369	418/23174	1.31e-06	3.18e-05	2.48e-05
GO:0043401	steroid hormone mediated signaling pathway	36/3369	111/23174	1.46e-06	3.45e-05	2.69e-05
GO:0006091	generation of precursor metabolites and energy	88/3369	372/23174	1.73e-06	4.03e-05	3.14e-05
GO:0008654	phospholipid biosynthetic process	46/3369	158/23174	1.76e-06	4.05e-05	3.16e-05
GO:0042073	intraciliary transport	20/3369	46/23174	2.05e-06	4.62e-05	3.6e-05
GO:0006084	acetyl-CoA metabolic process	16/3369	32/23174	2.25e-06	5e-05	3.9e-05
GO:0042752	regulation of circadian rhythm	38/3369	122/23174	2.3e-06	5.06e-05	3.94e-05
GO:0045841	negative regulation of mitotic metaphase/anaphase transition	18/3369	39/23174	2.32e-06	5.07e-05	3.95e-05
GO:0034976	response to endoplasmic reticulum stress	60/3369	229/23174	2.59e-06	5.56e-05	4.33e-05
GO:0098760	response to interleukin-7	11/3369	17/23174	3.19e-06	6.73e-05	5.24e-05
GO:0098761	cellular response to interleukin-7	11/3369	17/23174	3.19e-06	6.73e-05	5.24e-05
GO:1905037	autophagosome organization	32/3369	97/23174	3.64e-06	7.57e-05	5.9e-05
GO:0000045	autophagosome assembly	31/3369	93/23174	4.02e-06	8.33e-05	6.49e-05
GO:0061983	meiosis II cell cycle process	9/3369	12/23174	4.16e-06	8.44e-05	6.58e-05
GO:0022412	cellular process involved in reproduction in multicellular organism	97/3369	431/23174	5.3e-06	0.000104904	8.17e-05
GO:0017038	protein import	55/3369	209/23174	5.75e-06	0.000112479	8.76e-05
GO:0034198	cellular response to amino acid starvation	18/3369	42/23174	8.48e-06	0.000154396	0.000120279
GO:1905819	negative regulation of chromosome separation	18/3369	42/23174	8.48e-06	0.000154396	0.000120279
GO:1990928	response to amino acid starvation	19/3369	46/23174	9.19e-06	0.000166282	0.000129538
GO:0006342	chromatin silencing	28/3369	84/23174	1.16e-05	0.000203737	0.000158716
GO:0009895	negative regulation of catabolic process	70/3369	292/23174	1.18e-05	0.000206867	0.000161155
GO:0007281	germ cell development	78/3369	335/23174	1.2e-05	0.000209571	0.000163261
GO:0034599	cellular response to oxidative stress	65/3369	268/23174	1.61e-05	0.000269212	0.000209723
GO:0006497	protein lipidation	29/3369	90/23174	1.7e-05	0.000281753	0.000219493
GO:1901657	glycosyl compound metabolic process	33/3369	109/23174	2.01e-05	0.000326683	0.000254495
GO:0040001	establishment of mitotic spindle localization	15/3369	33/23174	2.03e-05	0.000328756	0.00025611
GO:0016125	sterol metabolic process	38/3369	134/23174	2.59e-05	0.000401988	0.00031316
GO:0070988	demethylation	20/3369	53/23174	2.66e-05	0.000412342	0.000321226
GO:0007292	female gamete generation	40/3369	144/23174	2.72e-05	0.000419688	0.000326948
GO:0018279	protein N-linked glycosylation via asparagine	11/3369	20/23174	2.83e-05	0.000431924	0.00033648
GO:0006085	acetyl-CoA biosynthetic process	10/3369	17/23174	3.03e-05	0.000457	0.000356015
GO:0032922	circadian regulation of gene expression	23/3369	66/23174	3.06e-05	0.000460069	0.000358406
GO:0016241	regulation of macroautophagy	31/3369	105/23174	6.02e-05	0.000836014	0.000651277
GO:0034728	nucleosome organization	37/3369	136/23174	8.63e-05	0.00115433	0.000899252
GO:0198738	cell-cell signaling by wnt	91/3369	427/23174	8.88e-05	0.00117712	0.000917005
GO:1904029	regulation of cyclin-dependent protein kinase activity	24/3369	75/23174	9.95e-05	0.0013131	0.00102294
GO:0034101	erythrocyte homeostasis	38/3369	142/23174	0.000102224	0.00134247	0.00104582
GO:0016032	viral process	64/3369	279/23174	0.000110497	0.00143818	0.00112038
GO:0042157	lipoprotein metabolic process	34/3369	123/23174	0.000116813	0.00150696	0.00117396
GO:0044282	small molecule catabolic process	69/3369	308/23174	0.000130998	0.00166424	0.00129649
GO:0045454	cell redox homeostasis	21/3369	63/23174	0.000138879	0.00173792	0.00135388
GO:1905508	protein localization to microtubule organizing center	14/3369	34/23174	0.000143336	0.00178605	0.00139138
GO:0034605	cellular response to heat	21/3369	64/23174	0.000178654	0.00215707	0.00168041
GO:0032868	response to insulin	53/3369	224/23174	0.000182295	0.00218754	0.00170415
GO:0030218	erythrocyte differentiation	35/3369	131/23174	0.00019446	0.00231451	0.00180307
GO:0006575	cellular modified amino acid metabolic process	43/3369	172/23174	0.000200422	0.00237099	0.00184706
GO:0070584	mitochondrion morphogenesis	11/3369	24/23174	0.000239576	0.00278346	0.00216839
GO:0016999	antibiotic metabolic process	35/3369	133/23174	0.000266934	0.00298843	0.00232807
GO:0033674	positive regulation of kinase activity	97/3369	475/23174	0.000272296	0.00304264	0.0023703
GO:0044403	symbiont process	76/3369	355/23174	0.000279718	0.00310774	0.00242101
GO:0001824	blastocyst development	38/3369	149/23174	0.000297905	0.00327864	0.00255415
GO:0032869	cellular response to insulin stimulus	46/3369	192/23174	0.000348471	0.00375732	0.00292705
GO:0007007	inner mitochondrial membrane organization	12/3369	29/23174	0.000403971	0.00422867	0.00329425
GO:1904293	negative regulation of ERAD pathway	7/3369	12/23174	0.000550175	0.00550551	0.00428894
GO:1905897	regulation of response to endoplasmic reticulum stress	22/3369	74/23174	0.000605555	0.00592774	0.00461787
GO:0019216	regulation of lipid metabolic process	71/3369	336/23174	0.000638689	0.00622083	0.00484619
GO:0039694	viral RNA genome replication	11/3369	27/23174	0.000822071	0.00771137	0.00600736
GO:0062033	positive regulation of mitotic sister chromatid segregation	8/3369	16/23174	0.00085154	0.00788653	0.00614381
GO:0060996	dendritic spine development	31/3369	121/23174	0.00094377	0.00864481	0.00673454
GO:0003300	cardiac muscle hypertrophy	27/3369	101/23174	0.000983766	0.00899707	0.00700896
GO:0051098	regulation of binding	81/3369	399/23174	0.000992796	0.00906547	0.00706224
GO:0035082	axoneme assembly	20/3369	67/23174	0.00099479	0.0090695	0.00706538
GO:0000302	response to reactive oxygen species	46/3369	201/23174	0.000997674	0.00908163	0.00707483
GO:0007339	binding of sperm to zona pellucida	14/3369	40/23174	0.00101677	0.00922675	0.00718789
GO:0072425	signal transduction involved in G2 DNA damage checkpoint	7/3369	13/23174	0.00104248	0.00932311	0.00726295
GO:0001558	regulation of cell growth	86/3369	429/23174	0.00105531	0.00934768	0.00728209
GO:0019217	regulation of fatty acid metabolic process	24/3369	87/23174	0.00114313	0.0100249	0.00780963
GO:0045922	negative regulation of fatty acid metabolic process	10/3369	24/23174	0.00115104	0.0100249	0.00780963
GO:0048588	developmental cell growth	56/3369	258/23174	0.00118045	0.0101598	0.00791477
GO:0003301	physiological cardiac muscle hypertrophy	14/3369	41/23174	0.00133978	0.0114135	0.00889141
GO:0045494	photoreceptor cell maintenance	14/3369	41/23174	0.00133978	0.0114135	0.00889141
GO:0061049	cell growth involved in cardiac muscle cell development	14/3369	41/23174	0.00133978	0.0114135	0.00889141
GO:0140053	mitochondrial gene expression	27/3369	103/23174	0.00135273	0.0114904	0.00895129
GO:2000001	regulation of DNA damage checkpoint	8/3369	17/23174	0.0014043	0.0118595	0.00923883
GO:0043254	regulation of protein complex assembly	88/3369	445/23174	0.00142695	0.0120333	0.00937426
GO:0106027	neuron projection organization	26/3369	99/23174	0.00159654	0.0132594	0.0103295
GO:0098927	vesicle-mediated transport between endosomal compartments	14/3369	42/23174	0.00174415	0.0142756	0.0111211
GO:0008637	apoptotic mitochondrial changes	28/3369	110/23174	0.00179987	0.0146906	0.0114443
GO:0090069	regulation of ribosome biogenesis	7/3369	14/23174	0.00182406	0.0147848	0.0115177
GO:0046916	cellular transition metal ion homeostasis	25/3369	95/23174	0.00188486	0.0152142	0.0118523
GO:0104004	cellular response to environmental stimulus	61/3369	292/23174	0.00195427	0.0156449	0.0121878
GO:0099173	postsynapse organization	43/3369	191/23174	0.00199854	0.0159121	0.012396
GO:0051668	localization within membrane	42/3369	186/23174	0.00210723	0.0167188	0.0130244
GO:0072583	clathrin-dependent endocytosis	12/3369	34/23174	0.00211417	0.0167188	0.0130244
GO:0051851	modification by host of symbiont morphology or physiology	20/3369	71/23174	0.00216977	0.0170891	0.0133129
GO:0051657	maintenance of organelle location	6/3369	11/23174	0.00224552	0.0172216	0.0134161
GO:0090148	membrane fission	6/3369	11/23174	0.00224552	0.0172216	0.0134161
GO:1905288	vascular associated smooth muscle cell apoptotic process	6/3369	11/23174	0.00224552	0.0172216	0.0134161
GO:1905459	regulation of vascular associated smooth muscle cell apoptotic process	6/3369	11/23174	0.00224552	0.0172216	0.0134161
GO:0060249	anatomical structure homeostasis	78/3369	393/23174	0.00231582	0.0177142	0.0137998
GO:0019080	viral gene expression	17/3369	57/23174	0.00233854	0.0178413	0.0138988
GO:0098930	axonal transport	17/3369	57/23174	0.00233854	0.0178413	0.0138988
GO:1905268	negative regulation of chromatin organization	18/3369	62/23174	0.00245834	0.0185654	0.014463
GO:0043087	regulation of GTPase activity	61/3369	295/23174	0.00250633	0.0188265	0.0146663
GO:0090150	establishment of protein localization to membrane	48/3369	222/23174	0.0027445	0.0204056	0.0158965
GO:0006506	GPI anchor biosynthetic process	11/3369	31/23174	0.00305821	0.0223402	0.0174036
GO:0060972	left/right pattern formation	9/3369	23/23174	0.003388	0.0243236	0.0189488
GO:0030968	endoplasmic reticulum unfolded protein response	17/3369	59/23174	0.00349191	0.0250389	0.019506
GO:0090630	activation of GTPase activity	21/3369	80/23174	0.00431289	0.0299697	0.0233472
GO:0015991	ATP hydrolysis coupled proton transport	10/3369	28/23174	0.00443509	0.0306006	0.0238387
GO:1902188	positive regulation of viral release from host cell	7/3369	16/23174	0.00465905	0.0317337	0.0247214
GO:0016226	iron-sulfur cluster assembly	8/3369	20/23174	0.00485227	0.0325939	0.0253915
GO:0031163	metallo-sulfur cluster assembly	8/3369	20/23174	0.00485227	0.0325939	0.0253915
GO:0031050	dsRNA processing	14/3369	47/23174	0.00556496	0.0370406	0.0288556
GO:0070918	production of small RNA involved in gene silencing by RNA	14/3369	47/23174	0.00556496	0.0370406	0.0288556
GO:0034390	smooth muscle cell apoptotic process	10/3369	29/23174	0.00590078	0.0388335	0.0302523
GO:0034391	regulation of smooth muscle cell apoptotic process	10/3369	29/23174	0.00590078	0.0388335	0.0302523
GO:0090662	ATP hydrolysis coupled transmembrane transport	10/3369	29/23174	0.00590078	0.0388335	0.0302523
GO:0099131	ATP hydrolysis coupled ion transmembrane transport	10/3369	29/23174	0.00590078	0.0388335	0.0302523
GO:0099132	ATP hydrolysis coupled cation transmembrane transport	10/3369	29/23174	0.00590078	0.0388335	0.0302523
GO:0099590	neurotransmitter receptor internalization	12/3369	38/23174	0.00597221	0.0390835	0.0304471
GO:0098727	maintenance of cell number	37/3369	169/23174	0.00634625	0.0413001	0.0321739
GO:1905475	regulation of protein localization to membrane	40/3369	186/23174	0.00643804	0.0414296	0.0322748
GO:0045444	fat cell differentiation	49/3369	238/23174	0.00677998	0.0434454	0.0338451
GO:0001539	cilium or flagellum-dependent cell motility	11/3369	34/23174	0.00682052	0.0434812	0.033873
GO:0060285	cilium-dependent cell motility	11/3369	34/23174	0.00682052	0.0434812	0.033873
GO:0106118	regulation of sterol biosynthetic process	7/3369	17/23174	0.00693738	0.0436405	0.0339971
GO:0055076	transition metal ion homeostasis	29/3369	126/23174	0.00718916	0.0449342	0.0350049
GO:0019827	stem cell population maintenance	36/3369	165/23174	0.00742888	0.0463829	0.0361335
GO:0046434	organophosphate catabolic process	43/3369	205/23174	0.00768233	0.047863	0.0372866
GO:2000241	regulation of reproductive process	37/3369	171/23174	0.00771303	0.0478785	0.0372987
