# Supplementary material for: Identification of quiescent FOXC2+ spermatogonial stem cells in adult mammals
Source: eLife. 2023 Aug 23;12:RP85380. doi: 10.7554/eLife.85380 (PMC10446825; doi:10.7554/eLife.85380)
Supplement: Supplementary file 1. [file elife-85380-supp1.xlsx]

## Sheet: regents
	Gonotyping Primer	Primer-Forward	Primer-Reverse
	Vasa-cre	GCCTGCATTACCGGTCGATGC	CAGGGTGTTATAAGCAATCCC
	FOXC2 iCreERt2-WT	CTCCGTCCCTTCCTGCTCTCC	GCAGGAAGCTGCCATTCTCGAA
	FOXC2 iCreERt2-MU	CCTTCAGGATGCCGATCCGCC	CATCACCAGGGACACAGCATTGGAG
	Rosa26mTmGflox-WT	AAGGGAGCTGCAGTGGAGTA	CCGAAAATCTGTGGGAAGTC
	Rosa26mTmGflox-MU	CTGTTCCTGTACGGCATGG	CCGAAAATCTGTGGGAAGTC
	FOXC2flox/flox	GGGATGCAGAAAACTGTTGCC	CTGATCCCAAAGCCGGCAGTTA
	EGFPTg/+-1	ACGTAAACGGCCACAAGTTC	GATCTTGAAGTTCACCTTGATGC
	EGFPTg/+-2	GCACGACTTCTTCAAGTCCGCCATGCC	GCGGATCTTGAAGTTCACCTTGATGCC
	Rosa26-eGFP-DTA-WT	AAAGTCGCTCTGAGTTGTTAT	GGAGCGGGAGAAATGGATATG
	Rosa26-eGFP-DTA-MU	AAAGTCGCTCTGAGTTGTTAT	GCGAAGAGTTTGTCCTCAACC
	qRT-PCR Primer	Primer-Forward	Primer-Reverse
	Gfra1	GCACCAAGTACCGCACACT	GCGGCAGTTGTAGAGAGACTTC
	Ret	TCTATGGCGTCTACCGTACAC	GGGAAACCACCATTGCGGAT
	Foxc2	AACCCAACAGCAAACTTTCCC	GCGTAGCTCGATAGGGCAG
	Sohlh1	AGGAGGCGGATCTCGTTGA	GTCTGCAATCTGATTCGCCAG
	Sohlh2	ATTAAAGGCCCCGTTGTCGAG	AGCAAGACTTGATGCGTTCTC
	Kit	GGCCTCACGAGTTCTATTTACG	GGGGAGAGATTTCCCATCACAC
	Zbtb16	CTGGGACTTTGTGCGATGTG	CGGTGGAAGAGGATCTCAAACA
	Ddx4	ATGCACCACCGGCAATTTTG	TCCTGCTAATACAATGGGAATGC
	Dazl	CTGGTGTGTCGAAGGGCTATG	GTGGCTGCACATGATAAGTACAT
	Egr2	CCGTATCCGAGTAGCTTCGC	TCAATGGAGAATTTGCCCATGT
	Stra8	ACAACCTAAGGAAGGCAGTTTAC	GACCTCCTCTAAGCTGTTGGG
	Sox3	CGCCATCGCTTCGCACT	AGCTCAGATGTGGGTCAGCG
	Gapdh	TGACCTCAACTACATGGTCTACA	CTTCCCATTCTCGGCCTTG
	Lin28a	GGCATCTGTAAGTGGTTCAACG	CCCTCCTTGAGGCTTCGGA
	Neurog3	AGTGCTCAGTTCCAATTCCAC	CGGCTTCTTCGCTTTTTGCTG
	Sept7	CAGACGCGGCCAATGTAAAC	CTCGCGAGATTACCCACCTC
	Smc3	ACCTACATTCAAGTCGGGCG	AAAGCCTGGAGTGAGACGAG
	Nek1	CCACCTCGACCTGTGAAGTT	GCTACGCGGACGAAACAAAC
	Eif2ak4	ACAGGAGAGCTATTCGCAGC	GACCAACCACGTTCCTACCC
	Ezh2	CCCAATCGCCATCGCTTTTA	GTTCGGCCCTCTGATTGGAC
	Wee1	TAGAACGTGACTGGACACAGC	GTCTCCGGGTTCAGAAGCAT
	Mad2l1	TTAGGGCTCATTACGCCTGC	AACACTACCAACCTCACCGC
	Cdkn2d	GGTTTGTCTCTCCCGTAGCA	CTCTCCGCTGGGGTCAGTTA
	Fbxo5	TCCATCGTCTGTTACGAGCG	GTAGAGCGCGCCTAAATCCT
	Npm1	ATCCATCGAGTCTTCCATGAGG	ACCATATATACGTGCGGAGAGCC
	Antibody	Source	Identifier
	Anti-Foxc2 Antibody(IF)	R&D systems	AF6989
	Anti-Foxc2 Antibody(CUT&Tag)	abcam	ab5060
	Anti-Human LIN-28A Antibody	R&D systems	AF3757
	Anti-Rasgrp2 Antibody	Novus Biologicals	NBP1-33315
	Anti-Ppfibp2 Antibody	Santa Cruz	sc-514253
	Anti-Chd4 Antibody	abcam	ab70469
	Anti-Ccnd2 Antibody	Santa Cruz	sc-376676
	Anti-Rest Antibody	abcam	ab202962
	Anti-Ki67 Antibody	abcam	ab15580
	Anti-Gfra1 Antibody	R&D systems	AF560
	Anti-Gfra1 Antibody	R&D systems	MAB560
	Anti-Neurog3 Antibody	abcam	ab38548
	Anti-Thy1 Antibody	abcam	ab3105
	Anti-Thy1 MicroBeads	Miltenyi Biotec	130-049-101
	Anti-Eomes Antibody	abcam	ab23345
	Anti-Pax7 Antibody	Developmental Studies Hybridoma Bank
	Anti-Dazl Antibody	abcam	ab215718
	Anti-DDX4 / MVH Antibody	abcam	ab27591
	Anti-Tra98 Antibody	abcam	ab82527
	Anti-Cleaved Caspase3 Antibody	CST	9664s
	Anti-Sycp3 Antibody	abcam	ab97672
	Anti-Gapdh Antibody	abcam	ab8245
	Anti-ZBTB16 Antibody	Santa Cruz	sc-28319
	Alexa Fluor® 488 AffiniPure Donkey Anti-Mouse IgG (H+L)	Jackson Immuno Research (USA)	715-545-150
	Alexa Fluor® 594 AffiniPure Donkey Anti-Mouse IgG (H+L)	Jackson Immuno Research (USA)	715-585-150
	Alexa Fluor® 488 AffiniPure Donkey Anti-Rabbit IgG (H+L)	Jackson Immuno Research (USA)	711-545-152
	Alexa Fluor® 594 AffiniPure Donkey Anti-Rabbit IgG (H+L)	Jackson Immuno Research (USA)	711-585-152
	Alexa Fluor® 488 AffiniPure Donkey Anti-Goat IgG (H+L)	Jackson Immuno Research (USA)	705-545-003
	Alexa Fluor® 647 AffiniPure Donkey Anti-Goat IgG (H+L)	Jackson Immuno Research (USA)	705-605-003
	Alexa Fluor® 488 AffiniPure Donkey Anti-Rat IgG (H+L)	Jackson Immuno Research (USA)	712-545-150
	Alexa Fluor® 647 AffiniPure Donkey Anti-Rabbit IgG (H+L)	Jackson Immuno Research (USA)	711-607-003
	Alexa Fluor® 647 AffiniPure Donkey Anti-Mouse IgG (H+L)	Jackson Immuno Research (USA)	715-605-151
	Alexa Fluor® 594 AffiniPure Donkey Anti-Rat IgG (H+L)	Jackson Immuno Research (USA)	712-585-153
	Goat anti-Rabbit IgG（H+L）-HRP	ZSGB-BIO	ZB-2301
	Goat anti-Mouse IgG（H+L）-HRP	ZSGB-BIO	ZB-2305
	Rabbit anti-Goat IgG（H+L）-HRP	ZSGB-BIO	ZB-2306
